## 21 **Abstract**

## 22 **Background**

23 Chemotherapy is a principle tool for the control and prevention of piroplasmosis. The search for  
24 a new chemotherapy against *Babesia* and *Theileria* parasites has become increasingly urgent due  
25 to the toxic side effects of and developed resistance to the current drugs. Chalcones have  
26 attracted much attention due to their diverse biological activities. With the aim to discover new  
27 drugs and drug targets, *in vitro* and *in vivo* antibabesial activity of *trans*-chalcone (TC) and  
28 chalcone hydrate (CH) alone and combined with diminazene aceturate (DA), clofazimine (CF)  
29 and atovaquone (AQ) were investigated.

30

## 31 **Methodology/Principal findings**

32 The fluorescence- based assay was used for evaluating the inhibitory effect of TC and CH on  
33 five of *Babesia* and *Theileria* species, including *B. bovis*, *B. bigemina*, *B. divergens*, *B. caballi*,  
34 and *T. equi*, the combination with DA, CF, and AQ on *in vitro* cultures, and on the multiplication  
35 of a *B. microti*-infected mouse model. The cytotoxicity of compounds was tested on Madin-  
36 Darby bovine kidney (MDBK), mouse embryonic fibroblast (NIH/3T3), and human foreskin  
37 fibroblast (HFF) cell lines. The half maximal inhibitory concentration (IC<sub>50</sub>) values of TC and  
38 CH against *B. bovis*, *B. bigemina*, *B. divergens*, *B. caballi*, and *T. equi* were 69.6 ± 2.3, 33.3 ±  
39 1.2, 64.8 ± 2.5, 18.9 ± 1.7, and 14.3 ± 1.6 µM and 138.4 ± 4.4, 60.9 ± 1.1, 82.3 ± 2.3, 27.9 ± 1.2,  
40 and 19.2 ± 1.5 µM, respectively. In toxicity assays, TC and CH affected the viability of MDBK,  
41 NIH/3T3, and HFF cell lines the with half maximum effective concentration (EC<sub>50</sub>) values of  
42 293.9 ± 2.9, 434.4 ± 2.7, and 498 ± 3.1 µM and 252.7 ± 1.7, 406.3 ± 9.7, and 466 ± 5.7 µM,

43 respectively. In the mouse experiment, TC reduced the peak parasitemia of *B. microti* by 71.8%  
44 when administered intraperitoneally at 25 mg/kg. Combination therapies of TC–diminazene  
45 aceturate and TC–clofazimine were more potent against *B. microti* infection in mice than their  
46 monotherapies.

47

## 48 **Conclusions/Significance**

49 In conclusion, both TC and CH inhibited the growth of *Babesia* and *Theileria in vitro*, and TC  
50 inhibited the growth of *B. microti in vivo*. Therefore, TC and CH could be candidates for the  
51 treatment of piroplasmosis after further studies.

52

## 53 **Author summary**

54 Protozoa of the genus *Babesia* are the second most common blood-borne parasites of mammals  
55 after the trypanosomes. *Babesia* and *Theileria* are the etiological agents of piroplasmosis, a tick-  
56 transmitted disease causing substantial losses of livestock and companion animals worldwide  
57 and has recently gained attention as one of the emerging zoonosis in humans. Diminazene  
58 aceturate and imidocarb dipropionate are still the first choices for the treatment of animals.  
59 However, these drugs cause many adverse effects. Furthermore, they are not approved for human  
60 medicine. Therefore, the development of alternative treatment remedies against babesiosis is  
61 urgently required. In the present study we evaluated the effects chalcone hydrate (CH) and *trans*-  
62 chalcone (TC), against the growth of four species of *Babesia* and *T. equi*. Furthermore, we  
63 studied the chemotherapeutic potential of TC on *B. microti* in mice. The effects of the combined

64 treatment of TC with DA, CF and AQ revealed that TC was found to diminish the adverse effects  
65 of these drugs

## 66 **1. Introduction**

67 Babesiosis is one of the most severe infections of animals worldwide and has recently  
68 gained attention as one of the emerging zoonosis in humans [1, 2]. *Babesia bovis*, *Babesia*  
69 *bigemina*, and *Babesia divergens* infect cattle and cause bovine babesiosis. Of these, *B. bovis* is  
70 much more virulent than *B. bigemina* and *B. divergens* due to its ability to sequester in the  
71 capillaries, causing hypotensive shock syndrome and neurological damage [3]. In horses,  
72 *Babesia caballi* and *Theileria equi* (formerly *Babesia equi*) infect horses, causing equine  
73 piroplasmiasis. *T. equi* parasitizes leucocytes and erythrocytes for the completion of its life cycle,  
74 causing anemia, weight loss, lethargy, and fever [4], whereas *B. caballi* directly infects horse  
75 erythrocytes in a manner similar to *B. bovis* and *B. bigemina* in cattle. Human babesiosis is  
76 caused by *Babesia microti* in North America, while in Europe, it is caused by *Babesia divergens*.  
77 Human babesiosis manifests as an apparently silent infection to a fulminant, malaria-like disease,  
78 resulting occasionally in the death of the infected individual [5].

79 Prevention of babesiosis relies on vector control, vaccination, and chemotherapy. Thus far,  
80 chemotherapy has been the most successful method due to the availability of efficacious  
81 compounds such as diminazene aceturate and imidocarb dipropionate for animals and  
82 atovaquone, azithromycin clindamycin, and quinine for humans [5]. Unfortunately, atovaquone-  
83 resistant *Babesia gibsoni* has been reported [6, 7], and Mosqueda et al. (2012) reported the  
84 emergence of parasites resistant to diminazene aceturate (DA) [8]. Therefore, research to  
85 discover new drugs and drug targets is the fundamental approach toward addressing current  
86 limitations.

87 Chalcones (*trans*-1, 3-diaryl-2-propen-1-ones) are natural products belonging to the  
88 flavonoid family that are widespread in plants and are considered as intermediate in the  
89 flavonoid biosynthesis [9, 10]. They are recognized for their broad-spectrum biological activities,  
90 including antimalarial [11], anticancer, antileishmanial, antitrypanosomal [12, 13, 14, 15, 16],  
91 anti-inflammatory, antibacterial, antioxidant, antifilarial, antifungal, antimicrobial, larvicidal, and  
92 anticonvulsant ones [17, 18]. Based on the wide range of pharmacological effects, it is implied  
93 that chalcones have several modes of action in different parasites. For instance, Go et al. (2004)  
94 showed that chalcones modulate the permeability pathways of the *Plasmodium*-infected  
95 erythrocyte membrane, affecting its growth and multiplication [9]. Frölich et al. (2005) showed  
96 that chalcones inhibit glutathione (GSH)-dependent haemin degradation and binding to the active  
97 site of the cysteine protease (falcipain) enzyme involved in hemoglobin degradation in the  
98 *Plasmodium* parasite [11, 19, 20]. Chalcones inhibit the components of mitochondrial respiratory  
99 chain *bc<sub>1</sub>* complex (ubiquinol–cytochrome c reductase) (UQCR) [21]. Additionally, chalcones  
100 inhibit the cyclin-dependent protein kinases (CDKs) (Pfmrk and PfPK) and plasmepsin II [22].  
101 These various pathways demonstrate the importance of chalcones as chemotherapeutic  
102 candidates against malaria. However, the effect of chalcones had never been evaluated against  
103 *Babesia* and *Theileria* parasites. Therefore, this study evaluated the effects of chalcones, namely,  
104 chalcone hydrate (CH) and *trans*-chalcone (TC), against the growth of *B. bovis*, *B. bigemina*, *B.*  
105 *divergens*, *B. caballi*, and *T. equi in vitro*. Furthermore, we studied the chemotherapeutic  
106 potential of TC on *B. microti* in mice.

## 107 2. Materials and methods

### 108 2.1. Cultivation conditions

#### 109 2.1.1. Parasites and mice

110 The German bovine strain of *B. divergens* [23], the Texas strain of *B. bovis*, the Argentina strain  
111 of *B. bigemina*, and the United States Department of Agriculture (USDA) strains of *T. equi* and  
112 *B. caballi* were used for the *in vitro* studies, while the Munich strain of *B. microti* was used for  
113 the *in vivo* studies [24]. To perform the *in vivo* studies, female BALB/c mice (CLEA Japan, Inc.,  
114 Tokyo) housed under a pathogen-free environment with controlled temperature (22°C) and  
115 humidity and a 12 h light/dark cycle were used for the cultivation of *B. microti*.

116

#### 117 2.1.2. Reagents and chemicals

118 The *trans*-chalcone (TC) (**Fig. 1A**), chalcone hydrate (CH) (**Fig. 1B**), diminazene aceturate  
119 (DA), clofazimine (CF), and atovaquone (AQ) powders (Sigma-Aldrich Japan, Tokyo, Japan)  
120 were prepared in dimethyl sulfoxide (DMSO) (Wako Pure Chemical Industries, Ltd., Osaka,  
121 Japan) in 10 mM stock solutions and stored at -30°C.

122

### 123 **Fig 1. Chemical structure of *trans*-chalcone (A) and chalcone hydrate (B) used in this study**

124

125 The 10,000×SYBR Green 1 (SG1) nucleic acid stain (Lonza America, Alpharetta, GA, USA)  
126 was purchased and stored at -30°C, wrapped in aluminum foil paper for protection from direct

127 light. A lysis buffer containing Tris (130 mM at pH 7.5), EDTA (10 mM), saponin (0.016%  
128 w/v), and Triton X – 100 (1.6% v/v) was prepared and stored at 4°C.

129

### 130 **2.1.3. Cultivation of parasites *in vitro***

131 The purified bovine red blood cells (RBCs) were used to maintain *B. bovis*, *B. bigemina*, and *B.*  
132 *divergens*, and the purified equine RBCs were used to maintain *B. caballi* and *T. equi*. The  
133 cultivation was performed in the micro-aerophilic stationary-phase culture system at 37°C, 5%  
134 CO<sub>2</sub>, 5% O<sub>2</sub>, and 90% N<sub>2</sub> as previously described [23, 24]. M199 (Sigma-Aldrich, Tokyo,  
135 Japan), supplemented with 40% bovine serum was used to culture *B. bigemina* and *B. bovis*.  
136 Medium RPMI 1460 (Sigma-Aldrich, Tokyo, Japan) supplemented with 40% bovine serum was  
137 used to culture *B. divergens*. M199 supplemented with 40% equine serum and 13.6 µg/mL of  
138 hypoxanthine (MP Biomedicals, Santa Ana, CA, USA) was used to cultivate *T. equi*. GIT  
139 medium (Sigma-Aldrich, Tokyo, Japan) supplemented with 40% equine serum was used to  
140 maintain the *B. caballi* culture. To prevent bacterial and fungal contamination, 60 µg/mL of  
141 streptomycin and 0.15 µg/mL of amphotericin B (Sigma-Aldrich Corp., St. Louis, MO, USA)  
142 were added to all of the culture media.

143

### 144 **2.2. *In vitro* growth inhibitory effects**

145 The half maximal inhibitory concentration (IC<sub>50</sub>) for CH, TC, DA, AQ, and CF was determined  
146 using the fluorescence assay as previously described [23]. Briefly, 12.5, 25, 50, 100, and 200 µM  
147 CH and TC and 0.01, 0.1, 1, 10, and 100 µM DA, AQ, and CF were used to determine the

148 inhibition concentration in a 96-well plate with a 2.5% hematocrit for *B. bovis* and *B. bigemina*  
149 and a 5% hematocrit for *B. divergens*, *B. caballi*, and *T. equi*. The plates were cultivated for 4  
150 days without changing the media. On day 4, 100  $\mu$ L of lysis buffer containing 2 $\times$ SG1 was  
151 directly added to each well and gently mixed by pipetting. The plate was wrapped in aluminum  
152 foil paper for protection from direct light and incubated for 6 h at room temperature. After that,  
153 the plates were placed into the fluorescence spectrophotometer (Fluoroskan Ascent; Thermo  
154 Scientific, San Diego, CA, USA). The relative fluorescence values were read at 485 and 518 nm  
155 excitation and emission wavelengths, respectively. Positive control wells containing infected red  
156 blood cells (iRBCs) and uninfected red blood cells (RBCs) were included as negative control  
157 wells. Gain values were set to percentages after subtraction of the mean values of the negative  
158 control and transferred into GraphPad Prism (GraphPad Software, Inc., San Diego, California,  
159 USA) to calculate the IC<sub>50</sub> value using the non-linear regression analysis (curve fit).

160

### 161 **2.3. Morphological changes and viability experiment *in vitro***

162 The microscopy assay was performed as previously described [24]. Five concentrations at 0.25 $\times$ ,  
163 0.5 $\times$ , 1 $\times$ , 2 $\times$ , and 4 $\times$  the IC<sub>50</sub> of CH, TC, and DA were used for this experiment. A 100  $\mu$ L  
164 reaction volume containing 90  $\mu$ L of respective media and 10  $\mu$ L of iRBCs normalized to 1%  
165 parasitemia was incubated in a 96-well microtiter plate at 37°C in a humidified multi-gas water-  
166 jacketed incubator. The 90  $\mu$ L of media was changed daily and replaced with 90  $\mu$ L of new  
167 media containing the same concentration of drugs (CH or TC) for 4 consecutive days. In the  
168 course of the 4 days of treatment, Giemsa-stained thin blood smears were prepared, and the  
169 parasitemia in 10,000 RBCs was monitored every 24 h. On the 5<sup>th</sup> day, 3  $\mu$ L of RBCs from each



170 well was mixed with 7  $\mu$ L of fresh RBCs, transferred into a new 96-well microtiter plate, and  
171 cultured in drug-free media. The media were replaced every day, and the parasitemia was  
172 monitored every 2 days until 6 days after the last treatment. The viability of drug-treated  
173 parasites was checked in the blood smear for 6 days after the last treatment. The presence of  
174 parasites was recorded as positive (relapse), and the absence of parasites was recorded as  
175 negative (total parasite clearance). Each experiment was performed in triplicate in three separate  
176 trials. The morphological changes were observed under a light microscope, and micrographs  
177 were captured using Nikon Digital Sight  $\text{\textcircled{R}}$  (Nikon Corporation, Japan).

178

#### 179 **2.4. Combination treatment using CH or TC with DA, AQ, or CF *in vitro***

180 The combination studies were performed in accordance with the previously described  
181 protocol [24]. Three sets of duplicate wells with five selected concentrations of CH, TC, DA,  
182 AQ, and CF at 0.25 $\times$ , 0.5 $\times$ , 1 $\times$ , 2 $\times$ , and 4 $\times$  the IC<sub>50</sub> were loaded in a 96-well plate. The first set  
183 of wells contained concentrations of single CH treatments, the second set contained  
184 concentrations of single DA or AQ or CF treatment, and the third set contained the combination  
185 of CH with DA, AQ, or CF at a constant ratio (1:1). The same experiment was repeated for TC  
186 with DA, AQ, and CF in three separate trials. The cultivation was performed for 4 days in a 100  
187  $\mu$ L reaction volume of media containing the drug concentrations and a hematocrit of 2.5% for *B.*  
188 *bovis* and *B. bigemina* and 5% for *B. divergens*, *B. caballi*, and *T. equi*. On day 4, 100  $\mu$ L of lysis  
189 buffer containing 2 $\times$ SG1 was added. The plate was wrapped with aluminum foil for protection  
190 from light and incubated at room temperature for 6 h. The plates were then loaded into a  
191 fluorescence spectrophotometer, and the relative fluorescence values were read at 485 and 518

192 nm excitation and emission wavelengths, respectively. The obtained fluorescence values were set  
193 to percentages after subtraction of the mean values of the negative control. The growth inhibition  
194 values obtained were entered into CompuSyn software® (ComboSyn, Inc., Paramus, NJ, USA)  
195 [25] for calculation of the degree of association based on the combination index (CI) values. The  
196 CI values of the drug combination were determined using the formula  $[(1 \times IC_{50}) + (2 \times IC_{75}) +$   
197  $(3 \times IC_{90}) + (4 \times IC_{95})]/10$ , and the drug combination was considered synergistic if the value was  
198 less than 0.90, additive if the value was 0.90–1.10, and antagonistic if the value was more than  
199 1.10 [25].

200

## 201 **2.5. Evaluation of the effects of CH and TC on the host erythrocyte *in vitro***

202 The effects of CH and TC on the host RBCs (bovine and equine) were investigated as previously  
203 described [24]. Bovine and equine RBCs were incubated in the presence of 10, 100, and 200  $\mu$ M  
204 CH and TC for 3 and 6 h at 37°C. The RBCs were then washed three times with drug-free media  
205 and subsequently used for the cultivation of *B. bovis* and *T. equi*. The effect was monitored using  
206 the fluorescence assay.

207

## 208 **2.6. Cell cultures**

209 Madin–Darby bovine kidney (MDBK), mouse embryonic fibroblast (NIH/3T3), and  
210 human foreskin fibroblast (HFF) cell lines were cultured continuously at 37°C in a humidified  
211 incubator with 5% CO<sub>2</sub>. MDBK cell line was maintained in 75 cm<sup>2</sup> culture flasks with Minimum  
212 Essential Medium Eagle (MEM, Gibco, Thermo Fisher Scientific, Carlsbad, CA, USA), while  
213 Dulbecco’s Modified Eagle’s Medium (DMEM, Gibco, Thermo Fisher Scientific, Carlsbad, CA,

214 USA) was used for NIH/3T3, and HFF cell lines cultivation. Each medium was supplemented  
215 with 10% fetal bovine serum, 0.5% penicillin/streptomycin (Gibco, Thermo Fisher Scientific,  
216 Carlsbad, CA, USA), and an additional 1% glutamine. The medium was changed every 2 to 4  
217 days and incubated until approximately 80% confluent. The cells were checked by staining with  
218 4, 6-diamidino-2-phenylindole dihydrochloride (DAPI; Sigma-Aldrich Corp., St. Louis, MO,  
219 USA) to ensure free mycoplasma contamination. TrypLETM Express (Gibco, Thermo Fisher  
220 Scientific, Carlsbad, CA, USA) was used to allow cell detachment from the culture flask after  
221 washing two times with Dulbecco's phosphate-buffered saline (DPBS). Subsequently, viable  
222 cells were stained with 0.4% trypan blue solution and then counted using a Neubauer improved  
223 C-Chip (NanoEnTek Inc., Seoul, Korea).

224

## 225 **2.7. Cytotoxicity assay of CH, TC, DA, AQ, and CF on MDBK, NIH/3T3, and** 226 **HFF cell lines**

227 The drug-exposure viability assay was performed in accordance with the recommendation  
228 for the cell-counting Kit-8 (CCK-8, Dojindo, Japan). In a 96-well plate, 100  $\mu$ L of cells at a  
229 density of  $5 \times 10^4$  cells/mL was seeded per well and allowed to attach to the plate for 24 h at 37°C  
230 in a humidified incubator with 5% CO<sub>2</sub>. For CH and TC, 10  $\mu$ L of twofold dilutions was added  
231 to each well to a final concentration of 12.5–500  $\mu$ M in triplicate, while for DA, AQ, and CF, 10  
232  $\mu$ L of twofold dilutions was added to each well to a final concentration of 100  $\mu$ M in triplicate.  
233 The wells with only a culture medium were used as blanks, while the wells containing cells and a  
234 medium with 0.4% DMSO were used as a positive control. The exposure of drugs was carried

235 out for 24 h, followed by the addition of 10  $\mu$ L of CCK-8. The plate was further incubated for 3  
236 h, and the absorbance was measured at 450 nm using a microplate reader.

237

## 238 **2.8. The chemotherapeutic effect of TC against *B. microti* in mice**

239 The *in vivo* inhibitory effects of TC were evaluated against *B. microti* in mice as previously  
240 described [23]. Briefly, 50 female BALB/c mice at 8 weeks of age were caged in 10 groups (five  
241 mice/group). *B. microti* recovered from the frozen stock (stored at  $-80^{\circ}\text{C}$ ) was thawed and  
242 injected into two mice intraperitoneally. The parasitemia was monitored daily via microscopy.  
243 The mice were sacrificed and blood collected by cardiac puncture when the parasitemia was over  
244 40%. The blood was diluted with phosphate-buffered saline to obtain an inoculum containing  
245  $1 \times 10^7/\text{mL}$  of *B. microti* iRBCs. The mice in groups 2–10 received 0.5 mL intraperitoneal (IP)  
246 injections of the inoculum ( $1 \times 10^7$  *B. microti* iRBCs). Group 1 was left uninfected and untreated  
247 as a control. When the average parasitemia in all mice reached 1%, drug treatment was initiated  
248 for 5 days. The mice in group 2 received sesame oil via IP injection as a control. Groups 3–6  
249 received a 25 mg/kg IP injection of TC, a 25 mg/kg IP injection of DA, oral administration of 20  
250 mg/kg of AQ, and oral administration of 20 mg/kg of CF, respectively. Groups 7–9 were treated  
251 with a combination of (12.5 mg/kg of TC and 12.5 mg/kg of DA), (12.5 mg/kg of TC and 10  
252 mg/kg of AQ), and (12.5 mg/kg of TC and 10 mg/kg of CF), respectively, via a route similar to  
253 that for the single drug, while the mice in group 10 received DDW via IP injection as a control  
254 (infected and untreated mice). The parasitemia and blood parameters were monitored via  
255 microscopy and a hematology analyzer (Celltac  $\alpha$  MEK-6450, Nihon Kohden Corporation,  
256 Tokyo, Japan) every 2 and 4 days, respectively. The experiment was repeated twice. On day 45,  
257 blood was collected for PCR detection of the parasites.

258

## 259           **2.9.           The genomic DNA extraction and PCR detection of *B. microti***

260   Genomic DNA was extracted from the blood using a QIAamp DNA Blood Mini Kit (Qiagen,  
261   Tokyo, Japan). A nested PCR (nPCR) targeting a small-subunit rRNA (ss-rRNA) gene in *B.*  
262   *microti* was performed as described previously [24]. Briefly, the PCR amplifications were  
263   performed in a 10  $\mu$ L reaction mixture containing 0.5  $\mu$ M of each primer, 0.2 mM dNTP mix, 2  
264    $\mu$ L of 5 $\times$  SuperFi™ buffer, 0.1  $\mu$ L of Platinum SuperFi™ DNA polymerase (Thermo Fisher  
265   Scientific, Japan), 1  $\mu$ L of DNA template, and 4.9  $\mu$ L of DDW. The cycling conditions were  
266   94°C for 30 s denaturation, 53°C for 30 s annealing, and 72°C for 30 s as extension steps for 35  
267   cycles, using the forward (5'-CTTAGTATAAGCTTTTATACAGC-3') and reverse (5'-  
268   ATAGGTCAGAACTTGAATGATACA-3') primers. Afterward, 1  $\mu$ L of the DNA template  
269   from the first PCR amplification was used as the template for the nPCR assays under similar  
270   cycling conditions, using the forward (5'-GTTATAGTTTATTTGATGTTTCGTTT-3') and  
271   reverse (5'-AAGCCATGCGATTCGCTAAT-3') primers. After that, the PCR products were  
272   determined by electrophoresis in a 1.5% agarose gel, stained with ethidium bromide, and  
273   visualized under the UV Tran illuminator. The bands with an expected size of 154 bp were  
274   considered positive.

275

## 276           **2.10.           Statistical analysis**

277   The IC<sub>50</sub> values of CH, TC, DA, AQ, and CF were determined using the non-linear regression  
278   curve fit in GraphPad Prism (GraphPad Software, Inc., USA). The difference in parasitemia,

279 hematology profile, and body weight was analyzed using an independent student's *t*-test. A *p*-  
280 value < 0.05 was considered statistically significant.

281

## 282 **2.11. Ethical clearance**

283 All experiments were approved by the Animal Care and Use Committee and conducted in  
284 accordance with Regulations on Management and Operation of Animal Experiments as  
285 stipulated by Obihiro University of Agriculture and Veterinary Medicine (accession number  
286 of animal experiment: 28-111-2/28-110). These regulations were established by  
287 Fundamental Guidelines for Proper Conduct of Animal Experiment and Related Activities in  
288 Academic Research Institutions, the Ministry of Education, Culture, Sports and Technology  
289 (MEXT), Japan.

290

291        **3. Results**

292        **3.1.        The growth inhibitory effect of chalcones against *Babesia* and *Theileria***

293        The growth inhibitory assay was conducted on five species: *B. bovis*, *B. bigemina*, *B.*  
294 *divergens*, *B. caballi*, and *T. equi*. *Trans*-chalcone (TC) and chalcone hydrate (CH) inhibited the  
295 multiplication and growth of all species tested in a dose-dependent manner (**Figs 2 and 3**).

296

297        **Fig 2. Dose-response curves of TC against *Babesia* and *Theileria* parasites *in vitro***

298        The curves show the relative fluorescence units of *B. bovis*, *B. bigemina*, *B. divergens*, *B.*  
299 *caballi*, and *T. equi* treated with increasing concentrations of TC. The results were determined  
300 via fluorescence assay after 96 h of incubation in three separate trials. The values obtained from  
301 three separate trials were used to determine the IC<sub>50</sub> values using the non-linear regression (curve  
302 fit analysis) in GraphPad Prism software (GraphPad Software Inc., USA).

303

304        **Fig 3. Dose-response curves of CH against *Babesia* and *Theileria* parasites *in vitro***

305        The curves show the relative fluorescence units of *B. bovis*, *B. bigemina*, *B. divergens*, *B.*  
306 *caballi*, and *T. equi* treated with increasing concentrations of CH. The results were determined  
307 via fluorescence assay after 96 h of incubation in three separate trials. The values obtained from  
308 three separate trials were used to determine the IC<sub>50</sub> values using the non-linear regression (curve  
309 fit analysis) in GraphPad Prism software (GraphPad Software Inc., USA).

310

311

312 The IC<sub>50</sub> values of TC and CH on *B. bovis*, *B. bigemina*, *B. divergens*, *B. caballi*, and *T. equi*  
313 were 69.6, 33.3, 64.8, 18.9, and 14.3 μM and 138.4, 60.9, 82.3, 27.9, and 19.2 μM, respectively  
314 **(Table 1).**



**Table 1. The IC<sub>50</sub> and selectivity index of TC and CH**

| Compounds | Parasites            | IC <sub>50</sub> (μM) <sup>a</sup><br>parasites | EC <sub>50</sub> (μM) <sup>b</sup> |             |             | Selective index <sup>c</sup> |         |      |
|-----------|----------------------|-------------------------------------------------|------------------------------------|-------------|-------------|------------------------------|---------|------|
|           |                      |                                                 | MDBK                               | NIH/3T3     | HFF         | MDBK                         | NIH/3T3 | HFF  |
| TC        | <i>B. bovis</i>      | 69.6 ± 2.3                                      | 293.9 ± 2.9                        | 434.4 ± 2.7 | 498 ± 3.1   | 4.2                          | 6.2     | 7.2  |
|           | <i>B. bigemina</i>   | 33.3 ± 1.2                                      |                                    |             |             | 8.8                          | 13.1    | 15.0 |
|           | <i>B. divergens</i>  | 64.8 ± 2.5                                      |                                    |             |             | 4.5                          | 6.7     | 7.7  |
|           | <i>B. caballi</i>    | 18.9 ± 1.7                                      |                                    |             |             | 15.6                         | 23.0    | 26.3 |
|           | <i>T. equi</i>       | 14.3 ± 1.6                                      |                                    |             |             | 20.6                         | 30.4    | 34.8 |
|           | <i>P. falciparum</i> | 11.5*                                           |                                    |             |             |                              |         |      |
| CH        | <i>B. bovis</i>      | 138.4 ± 4.4                                     | 252.7 ± 1.7                        | 406.3 ± 9.7 | 466.3 ± 5.7 | 1.8                          | 2.9     | 3.4  |
|           | <i>B. bigemina</i>   | 60.9 ± 1.1                                      |                                    |             |             | 4.1                          | 6.7     | 7.7  |
|           | <i>B. divergens</i>  | 82.3 ± 2.3                                      |                                    |             |             | 3.1                          | 4.9     | 5.7  |
|           | <i>B. caballi</i>    | 27.9 ± 1.2                                      |                                    |             |             | 9.1                          | 14.6    | 16.7 |
|           | <i>T. equi</i>       | 19.2 ± 1.5                                      |                                    |             |             | 13.2                         | 21.2    | 24.3 |
|           | <i>P. falciparum</i> | 21.7**                                          |                                    |             |             |                              |         |      |

<sup>a</sup> Half maximum inhibition concentration of *trans*-chalcone (TC) and chalcone hydrate (CH) on the *in vitro* culture of parasites. The value was determined from the dose-response curve using non-linear regression (curve fit analysis). The values are the means of triplicate experiments.

<sup>b</sup> Half maximum effective concentration of TC and CH on the cell line. The values were determined from the dose-response curve using non-linear regression (curve fit analysis). The values are the means of triplicate experiments.

<sup>c</sup> Ratio of the EC<sub>50</sub> of cell lines to the IC<sub>50</sub> of each species. High numbers are favorable.

\*(Geyer et al., 2009)

\*\* (Go et al., 2004)

315 In this study, DA showed IC<sub>50</sub> values at 0.35, 0.68, 0.43, 0.022, and 0.71 μM against *B. bovis*, *B.*  
316 *bigemina*, *B. divergens*, *B. caballi*, and *T. equi*, respectively. AQ showed IC<sub>50</sub> values at 0.039,  
317 0.701, 0.038, 0.102, and 0.095 μM against *B. bovis*, *B. bigemina*, *B. divergens*, *B. caballi*, and *T.*  
318 *equi*, respectively. CF showed IC<sub>50</sub> values at 8.24, 5.73, 13.85, 7.95, and 2.88 μM against *B.*  
319 *bovis*, *B. bigemina*, *B. divergens*, *B. caballi*, and *T. equi*, respectively (**S1 Table**). The  
320 effectiveness of chalcones was not influenced by the diluent, since there was no significant  
321 difference in the inhibition between wells containing the DMSO and untreated wells. The  
322 precultivation of RBCs with TC and CH was conducted to determine their direct effect on host  
323 RBCs. Bovine and equine RBCs were incubated with TC or CH at 10, 100, and 200 μM for 3 h  
324 prior to the subculture of *B. bovis* and *T. equi*. The multiplication of *B. bovis* and *T. equi* did not  
325 significantly differ between TC- or CH-treated RBCs and normal RBCs for either species (data  
326 not shown).

327

### 328 **3.2. The viability of parasites treated with *trans*-chalcone and chalcone hydrate** 329 **and the morphological changes in treated parasites**

330 A viability assay was performed to determine whether the concentrations of TC and CH  
331 could completely clear parasites after 4 days of successive treatment, followed by withdrawal of  
332 the drug pressure. *B. bovis*, *B. bigemina*, and *B. caballi* treated with TC could not regrow at a  
333 concentration of 2×IC<sub>50</sub>, while *B. divergens* could not regrow at 4×IC<sub>50</sub>. *B. bovis*, *B. bigemina*, *B.*  
334 *divergens*, and *B. caballi* treated with CH could not regrow at a concentration of 4×IC<sub>50</sub>. *T. equi*  
335 treated with TC and CH could regrow at a concentration of 4×IC<sub>50</sub> (**Table 2**).

336

| Drugs | Conc. of compounds    | Parasites       |                    |                     |                   |                |
|-------|-----------------------|-----------------|--------------------|---------------------|-------------------|----------------|
|       |                       | <i>B. bovis</i> | <i>B. bigemina</i> | <i>B. divergens</i> | <i>B. caballi</i> | <i>T. equi</i> |
| TC    | 0.25×IC <sub>50</sub> | +               | +                  | +                   | +                 | +              |
|       | 0.5×IC <sub>50</sub>  | +               | +                  | +                   | +                 | +              |
|       | 1×IC <sub>50</sub>    | +               | +                  | +                   | +                 | +              |
|       | 2 ×IC <sub>50</sub>   | -               | -                  | +                   | -                 | +              |
|       | 4 ×IC <sub>50</sub>   | -               | -                  | -                   | -                 | +              |
| CH    | 0.25×IC <sub>50</sub> | +               | +                  | +                   | +                 | +              |
|       | 0.5×IC <sub>50</sub>  | +               | +                  | +                   | +                 | +              |
|       | 1×IC <sub>50</sub>    | +               | +                  | +                   | +                 | +              |
|       | 2 ×IC <sub>50</sub>   | +               | +                  | +                   | +                 | +              |
|       | 4 ×IC <sub>50</sub>   | -               | -                  | -                   | -                 | +              |
|       | Untreated control     | +               | +                  | +                   | +                 | +              |

337 **Table 2. The viability of *Babesia* and *Theileria* parasites treated with TC and CH**

338 The positive symbol (+) indicates regrowth of the parasites, and the negative symbol (-) indicates  
339 total clearance of the parasites on day 8 after withdrawing the drug pressure as seen in the  
340 microscopy assay.

341

342 Micrographs of TC- and CH-treated *B. bovis* (**Fig 4**), *B. bigemina*, *B. divergens*, *B. caballi* (**Fig**  
343 **5**), and *T. equi* consistently showed degeneration of the parasites by loss of the typical shapes at  
344 24 h, whereas further observations at 72 h showed deeply stained dot-shaped remnants of the  
345 parasites lodged within the erythrocytes.

346

347 **Fig 4. The morphological changes observed in TC- and CH-treated *B. bovis***

348 The arrows show TC- and CH-treated *B. bovis* parasites. The micrographs, C, were taken from  
349 the untreated wells. TC-a and CH-a were taken from treated wells at 24 h, while TC-b and CH-b  
350 were taken at 72 h.

351

352 **Fig 5. The morphological changes observed in TC- and CH-treated *B. caballi***

353 The arrows show TC- and CH-treated *B. caballi* parasites. The micrographs, C, were taken from  
354 the untreated wells. TC-a and CH-a were taken from treated wells at 24 h, while TC-b and CH-b  
355 were taken at 72 h.

356

357 **3.3. The effects of a combination of trans-chalcone or chalcone hydrate with**  
358 **diminazene aceturate, atovaquone, or clofazimine *in vitro***

359 A drug-combination analysis was performed to determine whether the combined treatments  
360 are synergistic (have a greater effect), additive (have a similar effect), or antagonistic (have a  
361 reduced effect or block the effect). Five dilutions of CH or TC (**S2 Table**), as recommended in  
362 the Chou–Talalay method [25], were combined at a constant ratio with DA, AQ, or CF. The  
363 inhibition percentage for the single drug and each combination was analyzed using CompuSyn  
364 software to generate the combination index (CI) values (**S3Table**). The combination treatments  
365 of TC–DA and CH–DA showed an additive effect against *B. bovis* and *B. bigemina* and a  
366 synergistic effect against *B. divergens*, *B. caballi*, and *T. equi*. The combination treatments of  
367 TC–AQ showed a synergistic effect against *B. bigemina*, *B. caballi*, and *T. equi* and an additive

368 effect against *B. bovis* and *B. divergens*. The combination treatments of CH–AQ showed a  
369 synergistic effect against *B. bovis*, *B. divergens*, *B. caballi*, and *T. equi* and an additive effect  
370 against *B. bigemina*. The combination treatments of TC–CF showed a synergistic effect against  
371 *B. bigemina*, *B. divergens*, *B. caballi*, and *T. equi* and an additive effect against *B. bovis*. The  
372 combination treatments of CH–CF showed a synergistic effect against *B. bigemina*, *B. caballi*,  
373 and *T. equi* and an additive effect against *B. bovis* and *B. divergens*. None of the combinations  
374 showed an antagonistic effect (**Table 3**).

Table 3. The effect of TC or CH with DA, AQ, or CF against *Babesia* and *Theileria* parasites *in vitro*

| Drug combinations |                       | Parasites       |                    |                     |                   |                |
|-------------------|-----------------------|-----------------|--------------------|---------------------|-------------------|----------------|
|                   |                       | <i>B. bovis</i> | <i>B. bigemina</i> | <i>B. divergens</i> | <i>B. caballi</i> | <i>T. equi</i> |
| TC+DA             | CI values             | 1.05573         | 1.0588             | 0.51622             | 0.14276           | 0.11061        |
|                   | Degree of association | Additive        | Additive           | Synergistic         | Synergistic       | Synergistic    |
| CH+DA             | CI values             | 1.06140         | 1.0733             | 0.51622             | 0.20318           | 0.04491        |
|                   | Degree of association | Additive        | Additive           | Synergistic         | Synergistic       | Synergistic    |
| TC+AQ             | CI values             | 1.0912          | 0.07825            | 0.97607             | 0.22977           | 0.52253        |
|                   | Degree of association | Additive        | Synergistic        | Additive            | Synergistic       | Synergistic    |
| CH+AQ             | CI values             | 0.38743         | 1.09269            | 0.76130             | 0.07987           | 0.10921        |
|                   | Degree of association | Synergistic     | Additive           | Synergistic         | Synergistic       | Synergistic    |
| TC+CF             | CI values             | 1.03190         | 0.11538            | 0.72582             | 0.73026           | 0.84954        |
|                   | Degree of association | Additive        | Synergistic        | Synergistic         | Synergistic       | Synergistic    |
| CH+CF             | CI values             | 1.04538         | 0.16805            | 1.00823             | 0.32754           | 0.48165        |
|                   | Degree of association | Additive        | Synergistic        | Additive            | Synergistic       | Synergistic    |

375

376 CI denotes the weighted average combination index value.

377        **3.4. Toxicity of *trans*-chalcone, chalcone hydrate, diminazene aceturate, atovaquone,**  
378 **and clofazimine on MDBK, NIH/3T3, and HFF cell lines**

379        *Trans*-chalcone and chalcone hydrate showed an inhibitory effect on the *in vitro* culture of  
380 *Babesia* and *Theileria* parasites. Therefore, the effect of TC and CH on the host cells was  
381 evaluated using MDBK, NIH/3T3, and HFF cell lines to see the cytotoxicity of the two  
382 compounds (**Table 1**). The EC<sub>50</sub> values of TC on MDBK, NIH/3T3, and HFF cell lines were  
383 293.9 ± 2.9, 434.4 ± 2.7, and 498 ± 3.1 µM, respectively. The EC<sub>50</sub> values of CH on MDBK,  
384 NIH/3T3, and HFF cell lines were 252.7 ± 1.7, 406.3 ± 9.7, and 466 ± 5.7 µM, respectively  
385 (**Table 1**). In a separate assay, DA and AQ at 100 µM did not show any inhibition of MDBK,  
386 NIH/3T3, or HFF cell viability, while CF showed inhibition only of MDBK with an EC<sub>50</sub> value  
387 of 34 ± 3.4 µM (**S1 Table**). The selectivity index, defined as the ratio of EC<sub>50</sub> of the drugs tested  
388 on the cell line to IC<sub>50</sub> of the tested drugs on *in vitro* culture of parasites. For TC, the highest  
389 selectivity index was achieved on *T. equi*, for the MDBK cell line the selectivity index was found  
390 to be 20.6 times higher than its IC<sub>50</sub> on *T. equi*, while in the case of the NIH/3T3 cell line was  
391 found to be 30.4 times higher than the IC<sub>50</sub> and in the case of the HFF cell line showed  
392 selectivity index 34.8 times higher than its IC<sub>50</sub> on *T. equi*. For CH, the highest selectivity index  
393 was achieved on *T. equi* as in the case of the MDBK, NIH/3T3 and HFF cell lines was found to  
394 be 13.2 times, 21.2 times and 24.3 times higher than IC<sub>50</sub>, respectively (**Table 1**).

395

396        **3.5.        The chemotherapeutic effect of *trans*-chalcone against *B. microti* in mice**

397        For further evaluation of TC efficacy in comparison with other drugs, the chemotherapeutic  
398 effect of TC was examined in mice infected with *B. microti* (**Fig 6**).

399

400 **Fig 6. The growth inhibition of TC on *B. microti* in vivo**

401 The graph shows the inhibitory effects of TC, DA, AQ, and CF treatments as compared with the  
402 untreated group. The values plotted indicate the mean  $\pm$  standard deviation for two separate  
403 experiments. The asterisks (\*) indicate statistical significance ( $p < 0.05$ ) based on the unpaired  $t$ -  
404 test analysis. The arrow indicates 5 consecutive days of treatment. Parasitemia was calculated  
405 by counting infected RBCs among 2,000 RBCs using Giemsa-stained thin blood smears.

406

407 In the DDW control group, the multiplication of *B. microti* increased significantly and reached  
408 the highest parasitemia at 57.7% on day 8 post infection (p.i). In all treated groups, the level of  
409 parasitemia was cleared at a significantly lower percent of parasitemia than the control group ( $p$   
410  $< 0.05$ ) from days 6–12 p.i. In the monochemotherapy-treated mice, the peak parasitemia level  
411 reached 16.3% on day 9, 4.4% on day 8, 5.5% on day 8, and 4% on day 6 with 25 mg/kg TC, 25  
412 mg/kg DA, 20 mg/kg AQ, and 20 mg/kg CF, respectively (**Fig 6**). The parasitemia was  
413 undetectable via microscopy starting on day 13, 15, and 13 p.i. in mice treated with 25 mg/kg  
414 DA, 20 mg/kg AQ, and 20 mg/kg CF, respectively. In the combination-chemotherapy-treated  
415 groups, the peak parasitemia level reached 2.6%, 3.2%, and 10.4% with 12.5 mg/kg TC–12.5  
416 mg/kg DA, 12.5 mg/kg TC–10 mg/kg CF, and 12.5 mg/kg TC–10 mg/kg AQ, respectively, on  
417 day 9 (**Fig 7**).

418

419 **Fig 7. The growth inhibition of TC combinations on *B. microti* in vivo**



420 The graph shows the inhibitory effects of DA, AQ, and CF combined with TC treatments as  
421 compared with the untreated group. The values plotted indicate the mean  $\pm$  standard deviation  
422 for two separate experiments. The asterisks (\*) indicate statistical significance ( $p < 0.05$ ) based  
423 on the unpaired *t*-test analysis. The arrow indicates 5 consecutive days of treatment. Parasitemia  
424 was calculated by counting infected RBCs among 2,000 RBCs using Giemsa-stained thin  
425 blood smears.

426

427 The parasitemia was undetectable in microscopy examination on day 21 p.i. in mice treated with  
428 25 mg/kg TC. The parasitemia was undetectable in mice via microscopy assay on days 13, 17,  
429 and 21 p.i. with 12.5 mg/kg TC–12.5 mg/kg DA, 12.5 mg/kg TC–10 mg/kg CF, and 12.5 mg/kg  
430 TC–10 mg/kg AQ, respectively. The parasite DNA was not detected on day 45 with 25 mg/kg  
431 DA IP, 12.5 mg/kg TC–10 mg/kg CF, or 12.5 mg/kg TC–12.5 mg/kg DA. In all other groups (20  
432 mg/kg AQ oral, 20 mg/kg CF oral, 25 mg/kg TC IP, and 12.5 mg/kg TC–10 mg/kg AQ), the  
433 parasite DNA was detected until day 45 (**Fig 8**).

434

#### 435 **Fig 8. Molecular detection of parasite DNA in the treated groups**

436 The image shows the molecular detection of parasites in the treated groups. The double distilled  
437 water (DDW) was used as a negative control, and M is for the marker. The arrow shows the  
438 expected band length of 154 bp for positive cases of *B. microti*.

439

440 Furthermore, infection with *B. microti* reduces the RBC count (**Fig 9A**), hemoglobin  
441 concentration (**Fig 9B**), and hematocrit percentage (**Fig 9C**) in mouse blood, as observed in the  
442 DDW control group on days 8 and 12 p.i. Significant differences ( $p < 0.05$ ) in RBC count were  
443 observed between the DDW control group and all drug-treated groups on days 8 and 12.

444

445 **Fig 9. The changes in blood parameters in treated and untreated mice *in vivo***

446 The graphs show changes in the number of red blood cells (RBCs) (A), hemoglobin  
447 concentration (HGB) (B), and hematocrit percentage (HCT) (C) in different groups of treated  
448 mice as compared with untreated mice. The values plotted are the mean  $\pm$  standard deviation for  
449 two separate trials. Each group contained five mice. The asterisks (\*) indicate statistical  
450 significance ( $p < 0.05$ ) based on the unpaired *t*-test analysis.

#### 451 **4. Discussion**

452 The treatment of bovine and equine piroplasmosis is limited to diminazene aceturate (DA)  
453 and imidocarb propionate, while clindamycin–quinine and atovaquone–azithromycin  
454 combinations have been utilized to manage human babesiosis [8, 26]. Unfortunately, toxic  
455 effects and resistance of the piroplasms against the current drug molecules have been  
456 documented [2]. To overcome this challenge, research is urgently needed to discover new drug  
457 candidates and drug targets against piroplasms [8]. Therefore, the current study assessed the  
458 chemotherapeutic potential of CH and *trans*-chalcone (TC) against *Babesia* and *Theileria*  
459 parasites *in vitro* and *B. microti in vivo*. Further, the effects of combining CH and TC with the  
460 currently available drugs, namely, AQ, CF, and DA, against *Babesia* and *Theileria* parasites  
461 were assessed *in vitro*.

462 In the current study, both CH and TC were effective against the *Babesia* and *Theileria*  
463 parasites *in vitro* (**Figs 2 and 3**). It is noteworthy that CH and TC were most effective against *T.*  
464 *equi*, followed by *B. caballi*, *B. bigemina*, and *B. divergens*, whereas they were least effective  
465 against *B. bovis*. The IC<sub>50</sub> values shown by CH and TC against *Babesia* and *Theileria* parasites  
466 were comparable to those shown by CH and TC against *P. falciparum*, *Trypanosoma*, and  
467 *Leishmania* [9, 10, 13, 14, 22, 27]. This emphasizes that CH and TC are effective against many  
468 protozoan parasites. However, the mode of action has yet to be understood comprehensively in  
469 comparison with the existing data. In a previous study, Mi-Ichi et al. (2005) documented that  
470 chalcones are mitochondrial electron transport inhibitors that block ubiquinone (UQ) from  
471 binding to cytochrome *b* (*bc<sub>1</sub>*) in *Plasmodium* parasites and exhibit potent antimalarial  
472 activity[21]. Torres-Santos et al. (2009) and Chen et al. (2001) reported that chalcones inhibit the  
473 growth of *Leishmania* and *Trypanosomes* by inhibiting the activity of fumarate reductase (FRD),

474 one of the enzymes of the parasite respiratory chain that it is very important in the energy  
475 metabolism of the parasites [12, 15]. Since this enzyme is absent from mammalian cells, it could  
476 be an important target for drugs against protozoan parasites. Based on the previous findings, it is  
477 possible that chalcones also inhibit the mitochondrial respiratory chain enzymes in *Babesia* and  
478 *Theileria* parasites, which could be elucidated in future studies.

479 The viability assay showed that TC and CH were more effective against *Babesia* parasites  
480 than against *Theileria* parasites. *B. bovis*, *B. bigemina*, and *B. caballi* could not relapse at  $2\times IC_{50}$   
481 treatments of TC, while *B. divergens* could not relapse at  $4\times IC_{50}$  treatments of TC. *B. bovis*, *B.*  
482 *bigemina*, *B. caballi*, and *B. divergens* could not relapse at  $4\times IC_{50}$  treatments of CH. In contrast,  
483 *T. equi* recovered even at  $4\times IC_{50}$  treatments of CH and TC. This finding was similar to  
484 deductions by Tayebwa et al. (2018), who suggested that *T. equi* has better coping mechanisms  
485 than *Babesia* species [24]. However, the mechanism preventing *T. equi* from being completely  
486 killed by CH and TC remains unknown. In an attempt to visualize the morphological changes of  
487 CH- and TC-treated *Babesia* and *Theileria* parasites, micrographs were taken at various  
488 incubation times. The observations showed deformed and dividing parasites and irregular  
489 parasite shapes at 24 h and pyknotic remnants within the iRBCs at 72 h (**Figs 4 and 5**). This  
490 showed that chalcones have a time-dependent effect on the *Babesia* and *Theileria* parasites.  
491 Although the exact mode of action is yet to be elucidated, the parasites progressively lost their  
492 shape and became smaller. This could be attributed to the ability of chalcones to interfere with  
493 the metabolic pathway, as documented in *P. falciparum* and *Leishmania* parasites [21, 28].

494 Combination chemotherapy has been recommended against drug-resistant protozoan and  
495 bacterial pathogens. Additionally, combination chemotherapy reduces drug dosages, thereby  
496 reducing their toxic side effects. Hence, the current study explored the combination of TC and

497 CH with drugs such as DA, AQ, and CF *in vitro*. The findings of this study show that the effects  
498 of TC and CH combined with DA, AQ, or CF were either synergistic or additive against *Babesia*  
499 and *Theileria* parasites. The ability of TC and CH to combine with the current effective drugs is  
500 a property that can be explored in the development of chemotherapies against *Babesia* and  
501 *Theileria* [29]. That study showed that the CF–DA combination has additive effects on the *in*  
502 *vitro* growth of *B. bovis*, *B. bigemina*, and *B. caballi* and synergistic effects on that of *T. equi*,  
503 and the combination chemotherapy with low-dose regimens of CF and DA has a more potent  
504 inhibitory effect on *B. microti* in mice than did their monochemotherapies. It is imperative that  
505 further studies are performed to confirm the mechanisms of TC and CH against *Babesia* and  
506 *Theileria* so as to better understand the effect of interactions with other drugs such as DA, AQ,  
507 and CF.

508 The experiments to understand toxicity showed that CH and TC affected the viability of  
509 MDBK, NIH/3T3, and HFF cell lines with a dose-dependent inhibitory effect and a slightly high  
510 selectivity index. This finding is consistent with the results reported by Echeverria et al. (2009)  
511 [30]. They examined the cytotoxic activities of synthetic 2'-hydroxychalcones against  
512 hepatocellular carcinoma cells, demonstrating that synthetic 2'-hydroxychalcones show  
513 apoptosis induction and dose-dependent inhibition of cell proliferation without cytotoxic  
514 activities on normal cell lines [30]. Mi-Ichi et al. (2005) explained that the low cytotoxic activity  
515 of TC and CH against mammalian cell lines is attributed to the fact that the ubiquinol–  
516 cytochrome c reductase (UQCR) and succinate ubiquinone reductase (SQR) of *P. falciparum*  
517 mitochondria are different from those of the mammalian host cells [21]. With reference to the  
518 above, chalcones might be safe for use in animals and humans following further *in vivo* clinical  
519 studies.

520 The promising efficacy of TC *in vitro* prompted us to evaluate TC performance *in vivo*.  
521 TC administered intraperitoneally at a dose of 25 mg/kg resulted in a 71.8% inhibition of the  
522 parasitemia on day 9 p.i. However, the inhibition rate was lower than those in the presence of 25  
523 mg/kg DA, 20 mg/kg AQ, and 20 mg/kg CF, which were 92.5%, 90.8%, and 93.1%, respectively  
524 (**Fig 6**). Certainly, the additive and synergistic effects in these combinations were indicated by  
525 the high degree of association observed *in vitro*, which prompted studies *in vivo*. Therefore, the  
526 TC–DA and TC–CF combinations were evaluated in mice to determine whether combination  
527 treatment would enable the reduction of DA, AQ, and CF dosages without altering the  
528 therapeutic efficacy against *B. microti* infection. Interestingly, the combination treatment of TC  
529 and DA at a dose of 12.5 + 12.5 mg/kg improved the efficacy to 95.6%, while the combination of  
530 TC and AQ at a dose of 12.5 + 10 mg/kg resulted in 81.9% efficacy. The combination of TC and  
531 CF at a dose of 12.5 + 10 mg/kg resulted in a 94.4% inhibition in the parasitemia level at day 8  
532 p.i. (**Fig 7**). The potentiation of TC that was achieved in *in vivo* combination therapy confirms  
533 the result that was observed in the *in vitro* combination experiment, emphasizing that chalcones  
534 are good combinatorial drugs. With regard to the chemotherapeutic effects of TC against  
535 *Leishmania* in mice, Piñero et al. (2006) showed that a single dose of 4 mg/kg TC by  
536 subcutaneous administration could completely inhibit the pathogenicity of the *Leishmania*  
537 parasite *in vivo* [27]. In addition to being efficacious, chalcones enhanced the production of nitric  
538 oxide, which kills the intra-erythrocytic parasites and stimulates the host immune system [31].

539 In order to confirm the ability of TC to eliminate *B. microti*, a PCR assay was performed  
540 on samples collected on day 45 p.i. to be analyzed for the presence of DNA. Interestingly, this  
541 study confirmed the absence of *B. microti* DNA in groups treated with a combination  
542 chemotherapy of TC+DA or TC+CF (**Fig 8**) as compared to monotreatment. These results

543 underscore the importance of combination chemotherapy in the effective control of  
544 piroplasmosis. This finding further emphasizes the need for combination therapy to achieve the  
545 most optimum efficacy and prevent the relapse of infection or development of a carrier state  
546 [29]. Furthermore, TC did not show toxic side effects to mice (**Fig 9A-C**), consistent with a  
547 previous study [14]. Taken together, the findings advocate that TC is a potential drug against  
548 bovine and equine piroplasmosis.

## 549 **5. Conclusion**

550 CH and TC showed growth inhibitory and against *Babesia* and *Theileria* *in vitro*. Furthermore,  
551 TC showed chemotherapeutic efficacies against *B. microti* *in vivo*. TC effectiveness *in vivo* was  
552 comparable to that shown by DA, and it showed no toxicity to mice. The TC–DA and TC–CF  
553 combinations showed higher efficiency against piroplasms than did TC, DA, or CF  
554 monotherapies. This implies that TC could be used as a chemotherapeutic drug against  
555 piroplasmosis. Moreover, the results suggest that the TC–DA and TC–CF combination  
556 chemotherapies will be better choices for the treatment of piroplasmosis than TC, DA, or CF  
557 monotherapies.

558

559

## 560 **Acknowledgments**

561 The authors would like to thank Dr. Bumduuren Tuvshintulga for assistance with sourcing  
562 chalcone hydrate and *trans*-chalcone.

563

564

565



566           **References**

- 567           1. Bock R, Jackson L, Vos ADE, Jorgensen W. Babesiosis of cattle. *Parasitol.* 2004; 129:  
568           S247–269 PMID: 15938514
- 569
- 570           2. Weiss LM. Babesiosis in humans: a treatment review. *Expert Opin Pharmacother.* 2002;  
571           3: 1109–1115 <https://doi.org/10.1517/14656566.3.8.1109> PMID: 12150690
- 572
- 573
- 574           3. Vos AJ, Bock RE. Vaccination against bovine babesiosis. *Ann N Y Acad Sci,* 2006; 916:  
575           540–545 <https://doi.org/10.1111/j.1749-6632.2000.tb05333.x> PMID: 11193669
- 576
- 577           4. Wise LN, Pelzel-McCluskey AM, Mealey R.H, Knowles DP. Equine piroplasmiasis. *Vet*  
578           *Clin North Am Equine Pract.* 2014; 30: 677–693  
579           <https://doi.org/10.1016/j.cveq.2014.08.008> PMID: 25300637
- 580
- 581
- 582           5. Vannier E, Gewurz BE, Krause PJ. Human babesiosis. *Infect Dis Clin North Am.* 2008;  
583           22: 469–488 <https://doi.org/10.1016/j.idc.2008.03.010> PMID: 18755385
- 584
- 585           6. Srivastava IK, Morrisey JM, Darrouzet E, Daldal F, Vaidya AB. Resistance mutations  
586           reveal the atovaquone-binding domain of cytochrome b in malaria parasites. *Mol*

587 Microbiol. 1999; 33: 704–711 <https://doi.org/10.1046/j.1365-2958.1999.01515.x> PMID:  
588 10447880

589

590

591 7. Matsuu A, Miyamoto K, Ikadai H, Okano S, Higuchi S. Short report: Cloning of the  
592 *Babesia gibsoni* cytochrome B gene and isolation of three single nucleotide  
593 polymorphisms from parasites present after atovaquone treatment. Am J Trop Med. 2006;  
594 74: 593–597 <https://doi.org/10.4269/ajtmh.2006.74.593> PMID: 16606990

595

596 8. Mosqueda J, Olvera-Ramirez A, Aguilar-Tipacamu G, Canto GJ. Current advances in  
597 detection and treatment of babesiosis. Curr Med Chem. 2012; 19: 1504–1518 PMID:  
598 22360483

599

600

601 9. Go M-L, Liu M, Wilairat P, Rosenthal PJ, Saliba KJ, Kirk K. Antiplasmodial chalcones  
602 inhibit sorbitol-induced hemolysis of *Plasmodium falciparum*-infected erythrocytes.  
603 Antimicrob Agents Chemother. 2004; 48: 3241–3245 PMID: 15328079

604

605 10. Rahman M, Rahman A. Chalcone: A valuable insight into the recent advances and  
606 potential pharmacological activities. Chem Sci J. 2011; 2011: 1–16  
607 <http://astonjournals.com/esj>

608

609

- 610 11. Li R, Kenyon GL, Cohen FE, Chen X, Gong B, Dominguez JN, Davidson E, et al. *In*  
611 *vitro* antimalarial activity of chalcones and their derivatives. *J Med Chem.* 1995; 38:  
612 5031–5037 PMID: 8544179
- 613
- 614 12. Chen M, Zhai L, Christensen SB, Theander TG, Kharazmi A. Inhibition of rumarate  
615 reductase in *Leishmania major* and *L. donovani* by chalcones. *Antimicrob Agents*  
616 *Chemother.* 2001; 45: 2023–2029 PMID: 11408218
- 617
- 618
- 619 13. Kayser O, Kiderlen AF. *In vitro* leishmanicidal activity of naturally occurring chalcones.  
620 *Phyther Res.* 2001; 15: 148–152 <https://doi.org/10.1002/ptr.701> PMID: 11268116
- 621
- 622 14. Lunardi F, Guzela M, Rodrigues AT, Corrêa,R, Eger-Mangrich I, Steindel M, et al.  
623 Trypanocidal and leishmanicidal properties of substitution-containing chalcones.  
624 *Antimicrob Agents Chemother.* 2003; 47: 1449–1451 PMID: 12654691
- 625
- 626
- 627 15. Torres-Santos EC, Sampaio-Santos MI, Buckner FS, Yokoyama K, Gelb M, Urbina JA,  
628 et al. Altered sterol profile induced in *Leishmania amazonensis* by a natural  
629 dihydroxymethoxylated chalcone. *J Antimicrob Chemother.* 2009; 63: 469–472 PMID:  
630 19176591
- 631
- 632 16. Bortolotto LFB, Barbosa FR, Silva G, Bitencourt TA, Beleboni RO, Baek SJ, et al.

633 Cytotoxicity of *trans*-chalcone and licochalcone A against breast cancer cells is due to  
634 apoptosis induction and cell cycle arrest. *Biomed Pharmacother.* 2017; 85: 425–433  
635 <https://doi.org/10.1016/j.biopha.2016.11.047> PMID: 27903423

636

637

638 17. Awasthi SK, Mishra N, Dixit SK, Singh A, Yadav M, Yadav SS, Rathaur S. Antifilarial  
639 activity of 1, 3-diarylpropen-1-one: Effect on glutathione-S-transferase, a phase II  
640 detoxification enzyme. *Am J Trop Med Hyg.* 2009; 80: 764–768 PMID: 19407121

641

642 18. Zhang X-W, Zhao D-H, Quan Y-C, Sun L-P, Yin X-M, Guan L-P. Synthesis and  
643 evaluation of anti-inflammatory activity of substituted chalcone derivatives. *Med Chem*  
644 *Res.* 2010; 19: 403–412 <https://doi.org/10.1007/s00044-009-9202-z>

645

646

647 19. Frölich S, Schubert C, Bienzle U, et al. *In vitro* antiplasmodial activity of  
648 prenylatedchalcone derivatives of hops (*Humulus lupulus*) and their interaction with  
649 haemin. *Antimicrob Chemother.* 2005; 55: 883–887 <https://doi.org/10.1093/jac/dki099>  
650 PMID: 15824094

651

652 20. Orjih AU. On the mechanism of hemozoin production in malaria parasites: Activated  
653 erythrocyte membranes promote beta-hematin synthesis. *Exp Biol Med.* (Maywood)  
654 2001; 226: 746–752 <https://doi.org/10.1177/153537020222600806> PMID: 11520940

655

656

657 21. Mi-Ichi F, Miyadera H, Kobayashi T, Takamiya S, Waki S, Iwata S, et al. Parasite  
658 mitochondria as a target of chemotherapy: Inhibitory effect of licochalcone A on the  
659 *Plasmodium falciparum* respiratory chain. *Annals of the New York Academy of*  
660 *Sciences*. 2005; 1056: 46–54 <https://doi.org/10.1196/annals.1352.037> PMID: 16387676

661

662 22. Geyer JA, Keenan SM, Woodard CL, Thompson PA, Gerena L, Nichols DA, et al.  
663 Selective inhibition of Pfmrk, a *Plasmodium falciparum* CDK, by antimalarial 1,3-diaryl-  
664 2-propenones. *Bioorg Med Chem Lett*. 2009; 19: 1982–1985  
665 <https://doi.org/10.1016/j.bmcl.2009.02.042> PMID: 19250824

666

667

668 23. Guswanto A, Nugraha AB, Tuvshintulga B, Tayebwa DS, Rizk MA, Batiha GE-S, et al.  
669 17-DMAG inhibits the multiplication of several *Babesia* species and *Theileria equi* on *in*  
670 *vitro* cultures, and *Babesia microti* in mice. *Int J Parasitol Drugs Drug Resist*. 2018; 8:  
671 104–111 <https://doi.org/10.1016/j.ijpddr.2018.02.005> PMID: 29499568

672

673 24. Tayebwa DS, Tuvshintulga B, Guswanto A, Nugraha AB, Batiha GE-S, Gantuya S, et al.  
674 The effects of nitidine chloride and camptothecin on the growth of *Babesia* and *Theileria*  
675 parasites. *Ticks Tick Borne Dis*. 2018; 5: 1192–1201  
676 <https://doi.org/10.1016/j.ttbdis.2018.04.019> PMID: 29730263

677

678

- 679 25. Chou T-C. Theoretical basis, experimental design, and computerized simulation of  
680 synergism and antagonism in drug combination studies. *Pharmacol Rev.* 2006; 58: 621–  
681 681 <https://doi.org/10.1124/pr.58.3.10> PMID: 16968952  
682
- 683 26. Vial HJ, Gorenflot A. Chemotherapy against babesiosis. *Vet Parasitol.* 2006; 138: 147–  
684 160 <https://doi.org/10.1016/j.vetpar.2006.01.048> PMID: 16504402  
685  
686
- 687 27. Piñero J, Temporal RM, Silva-Gonçalves AJ, Jiménez IA, Bazzocchi IL, Oliva A, et al.  
688 New administration model of *trans*-chalcone biodegradable polymers for the treatment of  
689 experimental leishmaniasis. *Acta Trop.* 2006; 98: 59–65  
690 <https://doi.org/10.1016/j.actatropica.2006.02.001> PMID: 16529707  
691
- 692 28. De Mello TFP, Cardoso BM, Bitencourt HR, Donatti L, Aristides SMA, Lonardoni  
693 MVC, et al. Ultrastructural and morphological changes in *Leishmania* (*Viannia*)  
694 *braziliensis* treated with synthetic chalcones. *Exp Parasitol.* 2016; 160: 23–30  
695 <https://doi.org/10.1016/j.exppara.2015.11.005> PMID: 26632504  
696  
697
- 698 29. Tuvshintulga B, Aboulaila M, Sivakumar T, Tayebwa DS, Gantuya S, Naranbaatar K, et  
699 al. Chemotherapeutic efficacies of a clofazimine and diminazene aceturate combination  
700 against piroplasm parasites and their AT-rich DNA-binding activity on *Babesia bovis*. *Sci*  
701 *Rep.* 2017; 7: 13888 <https://doi.org/10.1038/s41598-017-14304-0>

702

703 30. Echeverria C, Santibañez JF, Donoso-Tauda O, Escobar C, Ramirez-Tagle R. Structural  
704 antitumoral activity relationships of synthetic chalcones. *Int J Mol Sci.* 2009; 10: 221–  
705 231 PMID: 19333443

706

707

708 31. De Mello TFP, Bitencourt HR, Pedroso RB, Aristides SMA, Lonardoni MVC, Silveira  
709 TGV. Leishmanicidal activity of synthetic chalcones in *Leishmania* (Viannia)  
710 *braziliensis*. *Exp Parasitol.* 2014; 136: 27–34  
711 <https://doi.org/10.1016/j.exppara.2013.11.003> PMID: 24269198

712           **Supporting information**

713           **S1 Table.** The IC<sub>50</sub> and selectivity indices of AQ, DA, and CF (Control drugs).

714           **S2 Table.** Concentrations of *trans*-chalcone and chalcone hydrate combined with  
715           diminazene aceturate, atovaquone and clofazimine against *Babesia* and *Theileria*  
716           parasites *in vitro*.

717           **S3 Table.** Calculation of weighted average of combination Index values.

718



**S1Table. The IC<sub>50</sub> and selectivity indices of AQ, DA, and CF (Control drugs).**

| Compound | Parasites           | IC <sub>50</sub> ( μM ) <sup>a</sup><br>parasites | EC <sub>50</sub> ( μM ) <sup>b</sup> |         |      | Selective index <sup>c</sup> |          |          |
|----------|---------------------|---------------------------------------------------|--------------------------------------|---------|------|------------------------------|----------|----------|
|          |                     |                                                   | MDBK                                 | NIH/3T3 | HFF  | MDBK                         | NIH/3T3  | HFF      |
| AQ       | <i>B. bovis</i>     | 0.039 ± 0.002                                     | >100                                 | >100    | >100 | > 10.4                       | > 10.4   | > 10.4   |
|          | <i>B. bigemina</i>  | 0.701 ± 0.04                                      |                                      |         |      | > 12.7                       | > 12.7   | > 12.7   |
|          | <i>B. divergens</i> | 0.038 ± 0.002                                     |                                      |         |      | > 18.5                       | > 18.5   | > 18.5   |
|          | <i>B. caballi</i>   | 0.102 ± 0.0141                                    |                                      |         |      | > 30.4                       | > 30.4   | > 30.4   |
|          | <i>T. equi</i>      | 0.095 ± 0.065                                     |                                      |         |      | > 13.4                       | > 13.4   | > 13.4   |
| DA       | <i>B. bovis</i>     | 0.35 ± 0.06                                       | >100                                 | >100    | >100 | > 285.7                      | > 285.7  | > 285.7  |
|          | <i>B. bigemina</i>  | 0.68 ± 0.09                                       |                                      |         |      | > 208.3                      | > 208.3  | > 208.3  |
|          | <i>B. divergens</i> | 0.43 ± 0.05                                       |                                      |         |      | > 232.5                      | > 232.5  | > 232.5  |
|          | <i>B. caballi</i>   | 0.022 ± 0.0002                                    |                                      |         |      | > 4545.5                     | > 4545.5 | > 4545.5 |
|          | <i>T. equi</i>      | 0.71 ± 0.05                                       |                                      |         |      | > 476.2                      | > 476.2  | > 476.2  |
| CF       | <i>B. bovis</i>     | 8.24 ± 1.7                                        | 34.7 ± 3.4                           | >100    | >100 | 4.2                          | > 12.1   | > 12.1   |
|          | <i>B. bigemina</i>  | 5.73 ± 1.9                                        |                                      |         |      | 6.1                          | > 17.5   | > 17.5   |
|          | <i>B. divergens</i> | 13.85 ± 4.3                                       |                                      |         |      | 2.5                          | > 7.2    | > 7.2    |
|          | <i>B. caballi</i>   | 7.95 ± 1.8                                        |                                      |         |      | 4.4                          | > 12.6   | > 12.6   |
|          | <i>T. equi</i>      | 2.88 ± 0.9                                        |                                      |         |      | 12.1                         | > 34.7   | > 34.7   |

<sup>a</sup> Half maximum inhibition concentration of atovaquone (AQ), diminazene aceturate (DA), and clofazimine (CF) on the *in vitro* culture of parasites. The value was determined from the dose-response curve using non-linear regression (curve fit analysis). The values are the means of triplicate experiments.

<sup>b</sup> Half maximum effective concentration of AQ, DA, and CF on the cell line. The values were determined from the dose-response curve using non-linear regression (curve fit analysis). The values are the means of triplicate experiments.

<sup>c</sup> Ratio of the EC<sub>50</sub> of cell lines to the IC<sub>50</sub> of each species. High numbers are favorable.

**S2Table. Concentrations of *trans*-chalcone and chalcone hydrate combined with diminazine acetate, atovaquone and clofazimine against *Babesia* and *Theileria* parasites *in vitro***

| Parasite            | Concentration (μM) | Trans-chalcone | Chalcone hydrate | Diminazine acetate | Atovaquone | Clofazimine |
|---------------------|--------------------|----------------|------------------|--------------------|------------|-------------|
| <i>B. bovis</i>     | C <sub>1</sub>     | 17.4           | 34.6             | 0.0875             | 0.00975    | 2.06        |
|                     | C <sub>2</sub>     | 34.8           | 69.2             | 0.175              | 0.0195     | 4.12        |
|                     | C <sub>3</sub>     | 69.6           | 138.4            | 0.35               | 0.039      | 8.24        |
|                     | C <sub>4</sub>     | 139.2          | 276.8            | 0.7                | 0.078      | 16.48       |
|                     | C <sub>5</sub>     | 278.4          | 553.6            | 1.4                | 0.156      | 32.96       |
| <i>B. bigemina</i>  | C <sub>1</sub>     | 8.33           | 15.225           | 0.17               | 0.17525    | 1.4325      |
|                     | C <sub>2</sub>     | 16.7           | 30.45            | 0.34               | 0.3505     | 2.865       |
|                     | C <sub>3</sub>     | 33.3           | 60.9             | 0.68               | 0.701      | 5.73        |
|                     | C <sub>4</sub>     | 66.6           | 121.8            | 1.36               | 1.402      | 11.46       |
|                     | C <sub>5</sub>     | 133.2          | 243.6            | 2.72               | 2.804      | 22.92       |
| <i>B. divergens</i> | C <sub>1</sub>     | 16.2           | 20.575           | 0.1075             | 0.0095     | 3.4625      |
|                     | C <sub>2</sub>     | 32.4           | 41.15            | 0.215              | 0.019      | 6.925       |
|                     | C <sub>3</sub>     | 64.8           | 82.3             | 0.43               | 0.038      | 13.85       |
|                     | C <sub>4</sub>     | 129.6          | 164.6            | 0.86               | 0.076      | 27.7        |
|                     | C <sub>5</sub>     | 259.2          | 329.2            | 1.72               | 0.152      | 55.4        |
| <i>B. caballi</i>   | C <sub>1</sub>     | 4.725          | 6.975            | 0.0055             | 0.0255     | 1.9875      |
|                     | C <sub>2</sub>     | 9.45           | 13.95            | 0.011              | 0.051      | 3.975       |
|                     | C <sub>3</sub>     | 18.9           | 27.9             | 0.022              | 0.102      | 7.95        |
|                     | C <sub>4</sub>     | 37.8           | 55.8             | 0.044              | 0.204      | 15.9        |
|                     | C <sub>5</sub>     | 75.6           | 111.6            | 0.088              | 0.408      | 31.8        |
| <i>T. equi</i>      | C <sub>1</sub>     | 3.575          | 4.8              | 0.775              | 0.02375    | 0.72        |
|                     | C <sub>2</sub>     | 7.15           | 9.6              | 0.355              | 0.0475     | 1.44        |
|                     | C <sub>3</sub>     | 14.3           | 19.2             | 0.71               | 0.095      | 2.88        |
|                     | C <sub>4</sub>     | 28.6           | 38.4             | 1.42               | 0.19       | 5.76        |
|                     | C <sub>5</sub>     | 57.2           | 76.8             | 2.84               | 0.38       | 11.52       |

Note: <sup>a</sup> C<sub>1</sub>–C<sub>5</sub> refer to the concentrations (μM) 0.25×IC<sub>50</sub>, 0.5×IC<sub>50</sub>, 1×IC<sub>50</sub>, 2 ×IC<sub>50</sub>, 4 ×IC<sub>50</sub> of *trans*-chalcone, chalcone hydrate combined with diminazine acetate, atovaquone and clofazimine. Combined concentrations were based on the calculated IC<sub>50</sub> values obtained from the *in vitro* fluorescence-based assay.

**S3 Table. Calculation of weighted average of combination Index values**

| Parasites           | Drug combinations <sup>a</sup> | Combination index values at |                  |                  |                  | Weighted average<br>CI values <sup>b</sup> |
|---------------------|--------------------------------|-----------------------------|------------------|------------------|------------------|--------------------------------------------|
|                     |                                | IC <sub>50</sub>            | IC <sub>75</sub> | IC <sub>90</sub> | IC <sub>95</sub> |                                            |
| <i>B. bovis</i>     | TC + DA                        | 0.7943                      | 0.963            | 1.403            | 0.907            | 1.05573                                    |
|                     | CH + DA                        | 2.710                       | 0.625            | 0.882            | 1.002            | 1.06140                                    |
|                     | TC + AQ                        | 0.614                       | 0.991            | 0.768            | 1.503            | 1.0912                                     |
|                     | CH + AQ                        | 0.4313                      | 0.357            | 0.411            | 0.374            | 0.38743                                    |
|                     | TC + CF                        | 0.2078                      | 0.591            | 1.008            | 1.510            | 1.03190                                    |
|                     | CH + CF                        | 0.3068                      | 0.897            | 0.815            | 1.477            | 1.04538                                    |
| <i>B. bigemina</i>  | TC +DA                         | 1.142                       | 1.090            | 0.954            | 1.101            | 1.0588                                     |
|                     | CH +DA                         | 1.580                       | 1.047            | 1.005            | 1.011            | 1.0733                                     |
|                     | TC +AQ                         | 0.4735                      | 0.073            | 0.025            | 0.022            | 0.07825                                    |
|                     | CH + AQ                        | 1.5459                      | 0.777            | 1.209            | 1.050            | 1.09269                                    |
|                     | TC +CF                         | 0.3658                      | 0.011            | 0.118            | 0.103            | 0.11538                                    |
|                     | CH + CF                        | 0.1765                      | 0.293            | 0.010            | 0.222            | 0.16805                                    |
| <i>B. divergens</i> | TC +DA                         | 1.1862                      | 0.359            | 0.418            | 0.501            | 0.51622                                    |
|                     | CH +DA                         | 1.3292                      | 0.572            | 0.319            | 0.433            | 0.51622                                    |
|                     | TC +AQ                         | 1.3137                      | 0.786            | 0.989            | 0.977            | 0.97607                                    |
|                     | CH + AQ                        | 0.1360                      | 0.981            | 0.701            | 0.853            | 0.76130                                    |
|                     | TC +CF                         | 1.0332                      | 0.541            | 0.777            | 0.703            | 0.72582                                    |
|                     | CH + CF                        | 0.2613                      | 0.810            | 1.303            | 1.073            | 1.00823                                    |
| <i>B. caballi</i>   | TC +DA                         | 0.6646                      | 0.118            | 0.165            | 0.008            | 0.14276                                    |
|                     | CH +DA                         | 0.1238                      | 0.052            | 0.372            | 0.172            | 0.20318                                    |
|                     | TC +AQ                         | 0.9247                      | 0.282            | 0.111            | 0.119            | 0.22977                                    |
|                     | CH + AQ                        | 0.1077                      | 0.103            | 0.091            | 0.053            | 0.07987                                    |
|                     | TC +CF                         | 1.6806                      | 0.697            | 0.608            | 0.601            | 0.73026                                    |
|                     | CH + CF                        | 0.6604                      | 0.192            | 0.113            | 0.473            | 0.32754                                    |
| <i>T. equi</i>      | TC +DA                         | 0.0211                      | 0.132            | 0.111            | 0.122            | 0.11061                                    |
|                     | CH +DA                         | 0.3661                      | 0.020            | 0.001            | 0.010            | 0.04491                                    |
|                     | TC +AQ                         | 1.0503                      | 0.537            | 0.431            | 0.452            | 0.52253                                    |
|                     | CH + AQ                        | 0.0391                      | 0.191            | 0.013            | 0.158            | 0.10921                                    |
|                     | TC +CF                         | 1.5984                      | 0.692            | 0.767            | 0.803            | 0.84954                                    |
|                     | CH + CF                        | 0.9435                      | 0.491            | 0.413            | 0.413            | 0.48165                                    |

CI value, combination index value; IC<sub>50</sub>, 50% inhibition concentration; DA, diminazene aceturate; AQ, atovaquone. <sup>a</sup> Two-drug combination between *trans*-chalcone, chalcone hydrate with diminazene aceturate, and atovaquone at a concentration of approximately 0.25 x IC<sub>50</sub>, 0.5 x IC<sub>50</sub>, IC<sub>50</sub>, 2 x IC<sub>50</sub>, and 4 x IC<sub>50</sub> (constant ratio). <sup>b</sup> The weighted average CI value was calculated with the formula [(1 x IC<sub>50</sub>) + (2 x IC<sub>75</sub>) + (3 x IC<sub>90</sub>) + (4 x IC<sub>95</sub>)]/10.

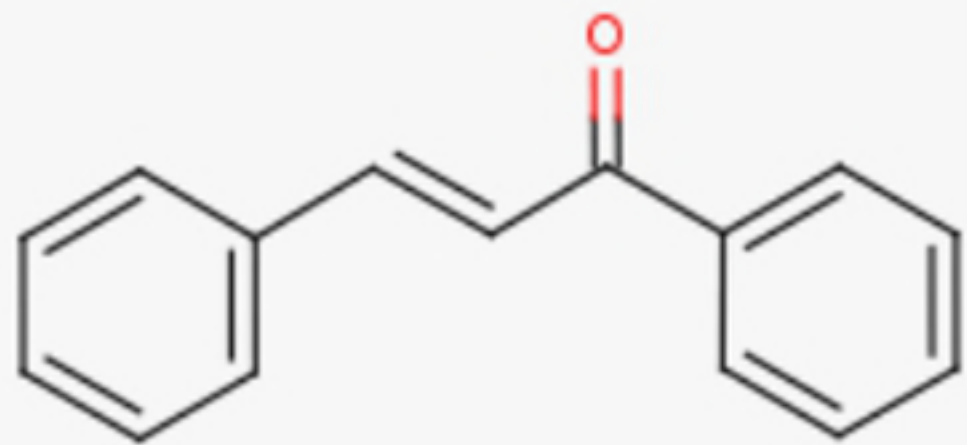

(A)

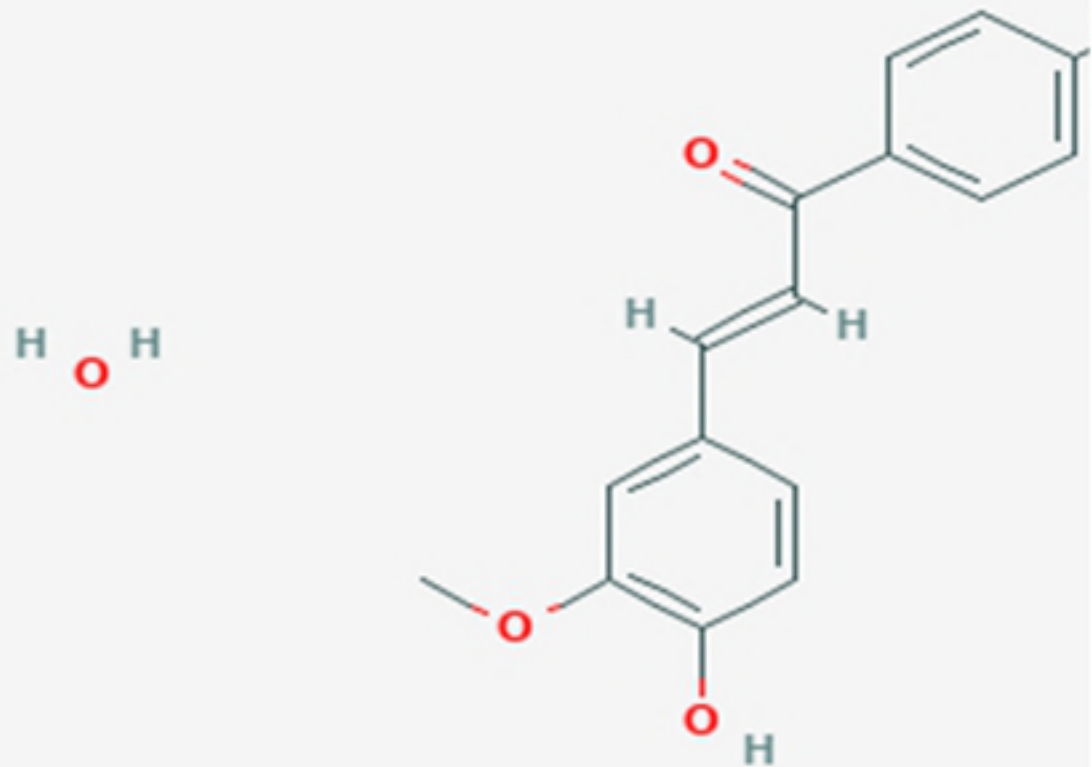

(B)

figure

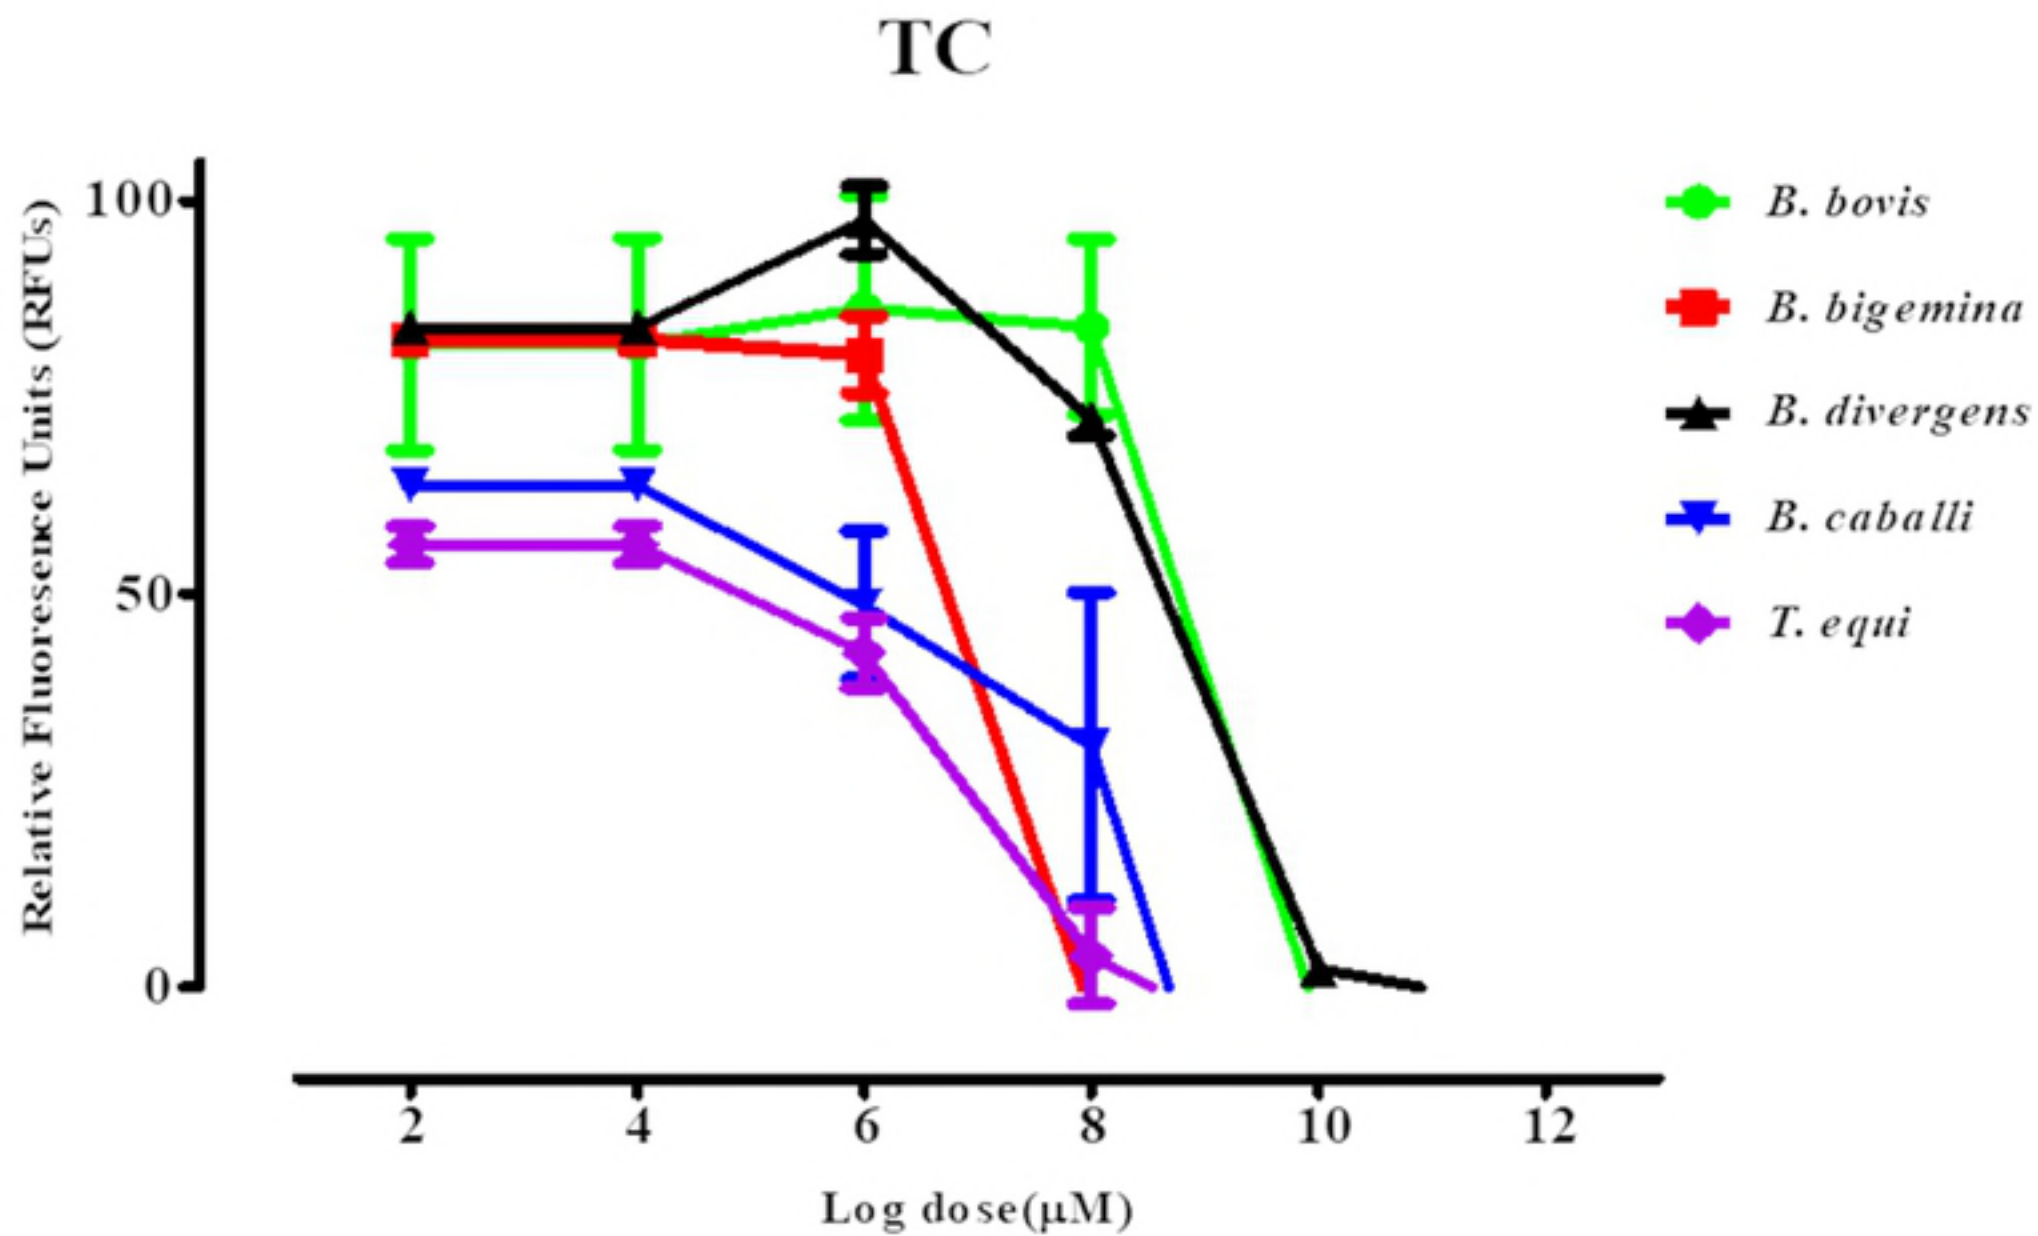

figure

CH

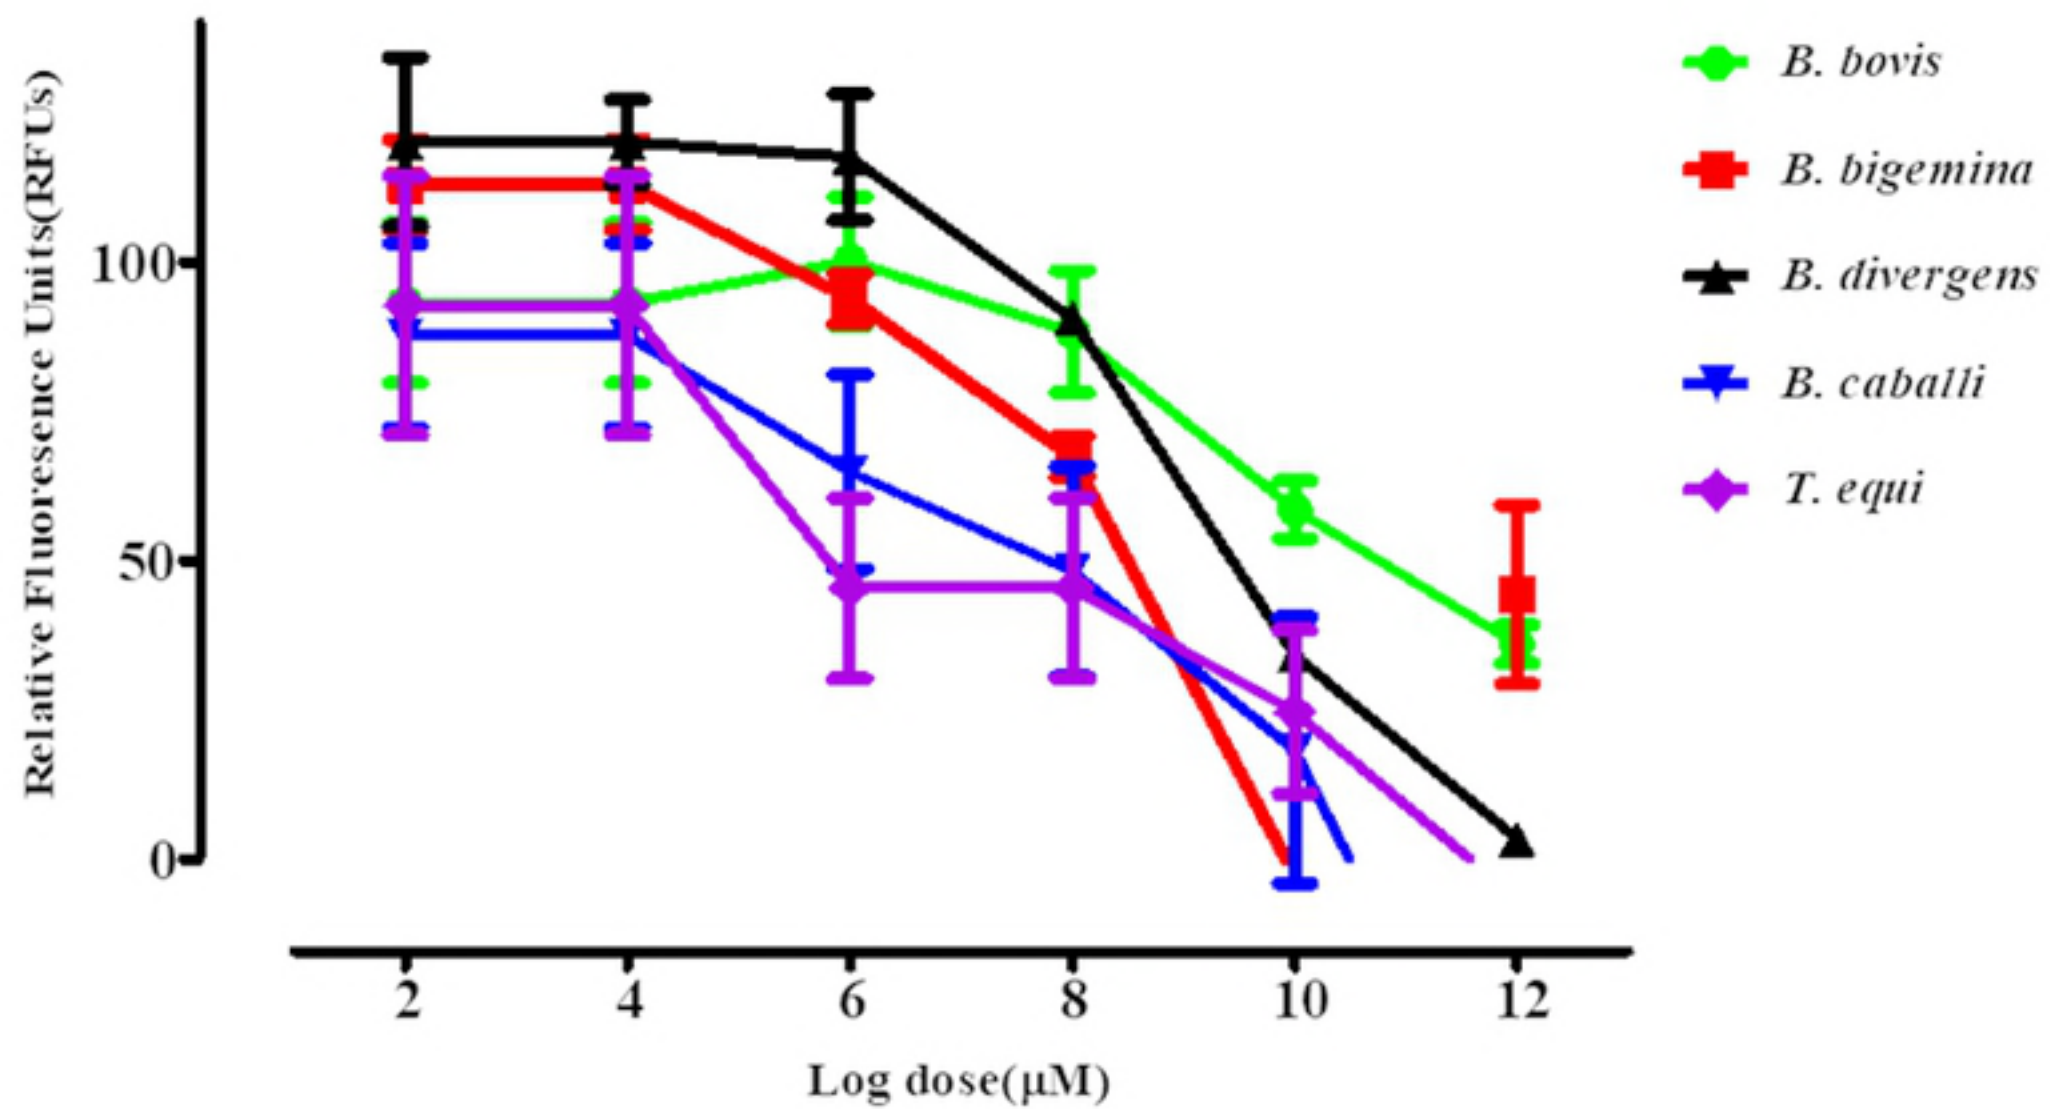

figure



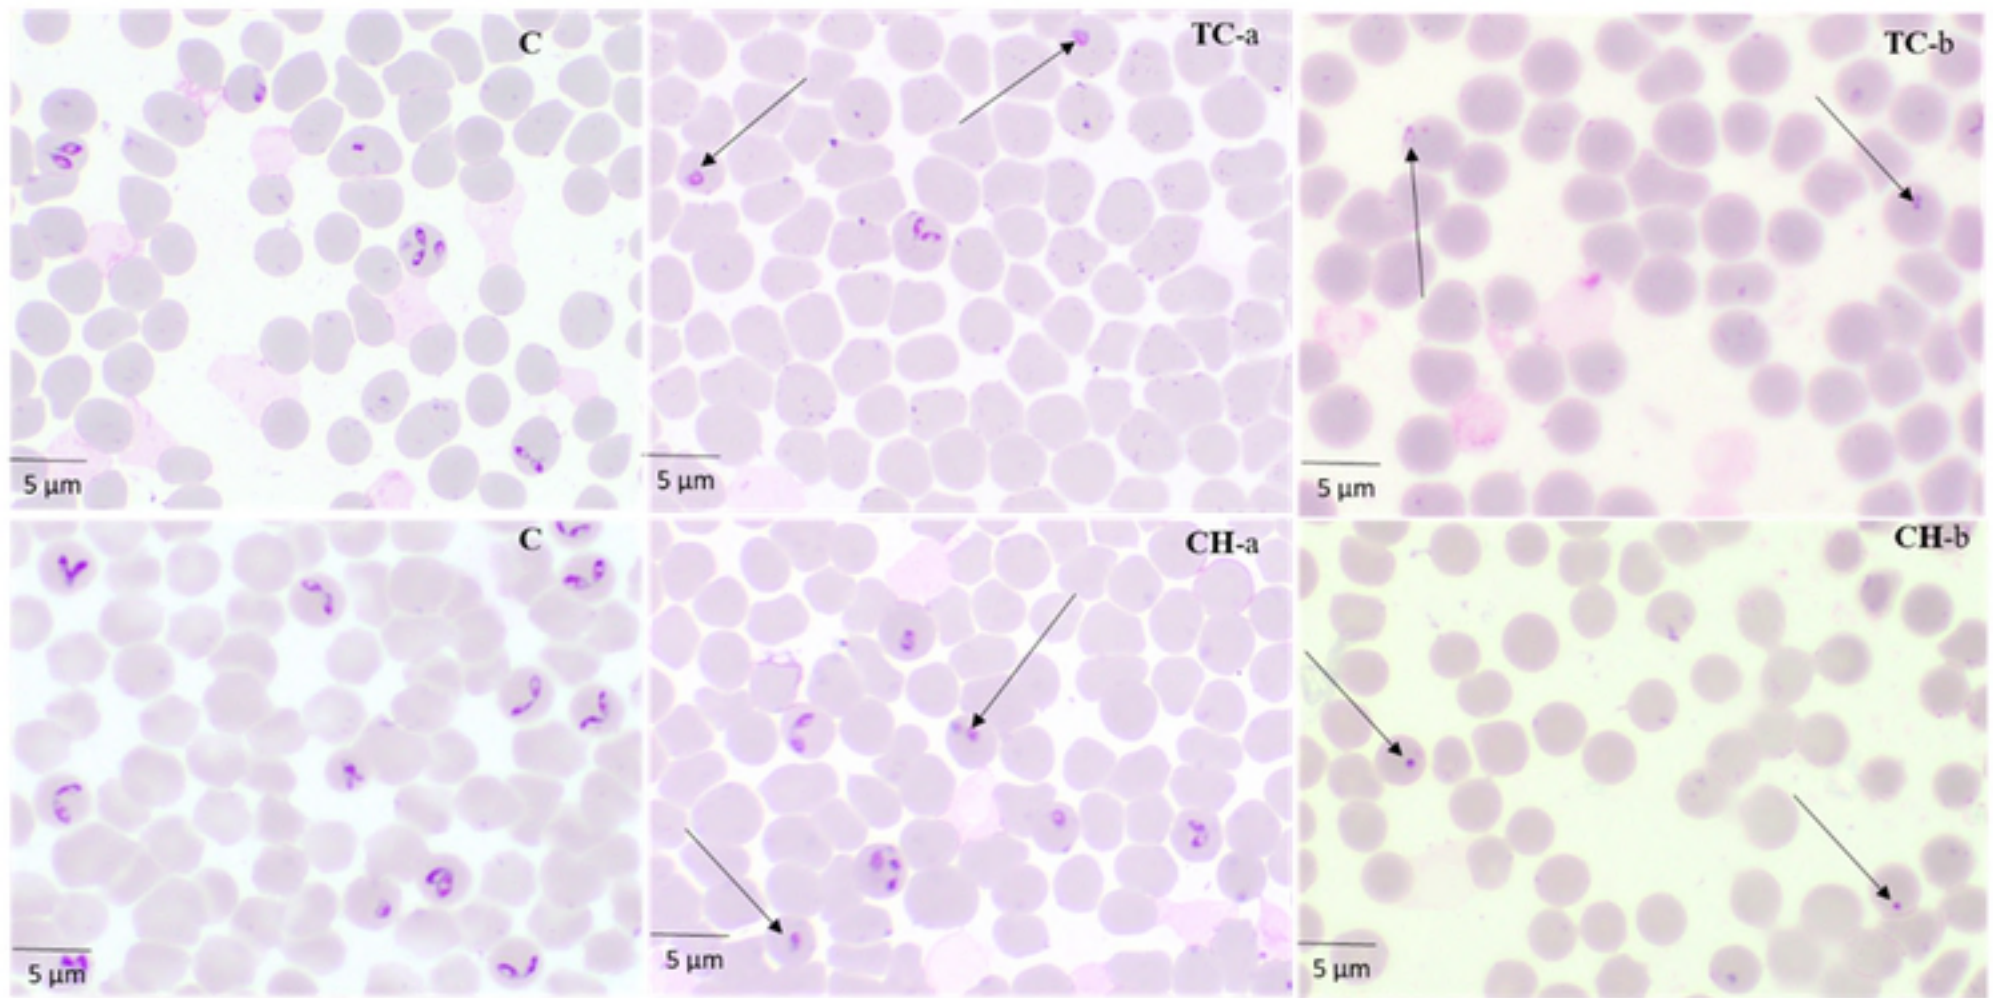

figure

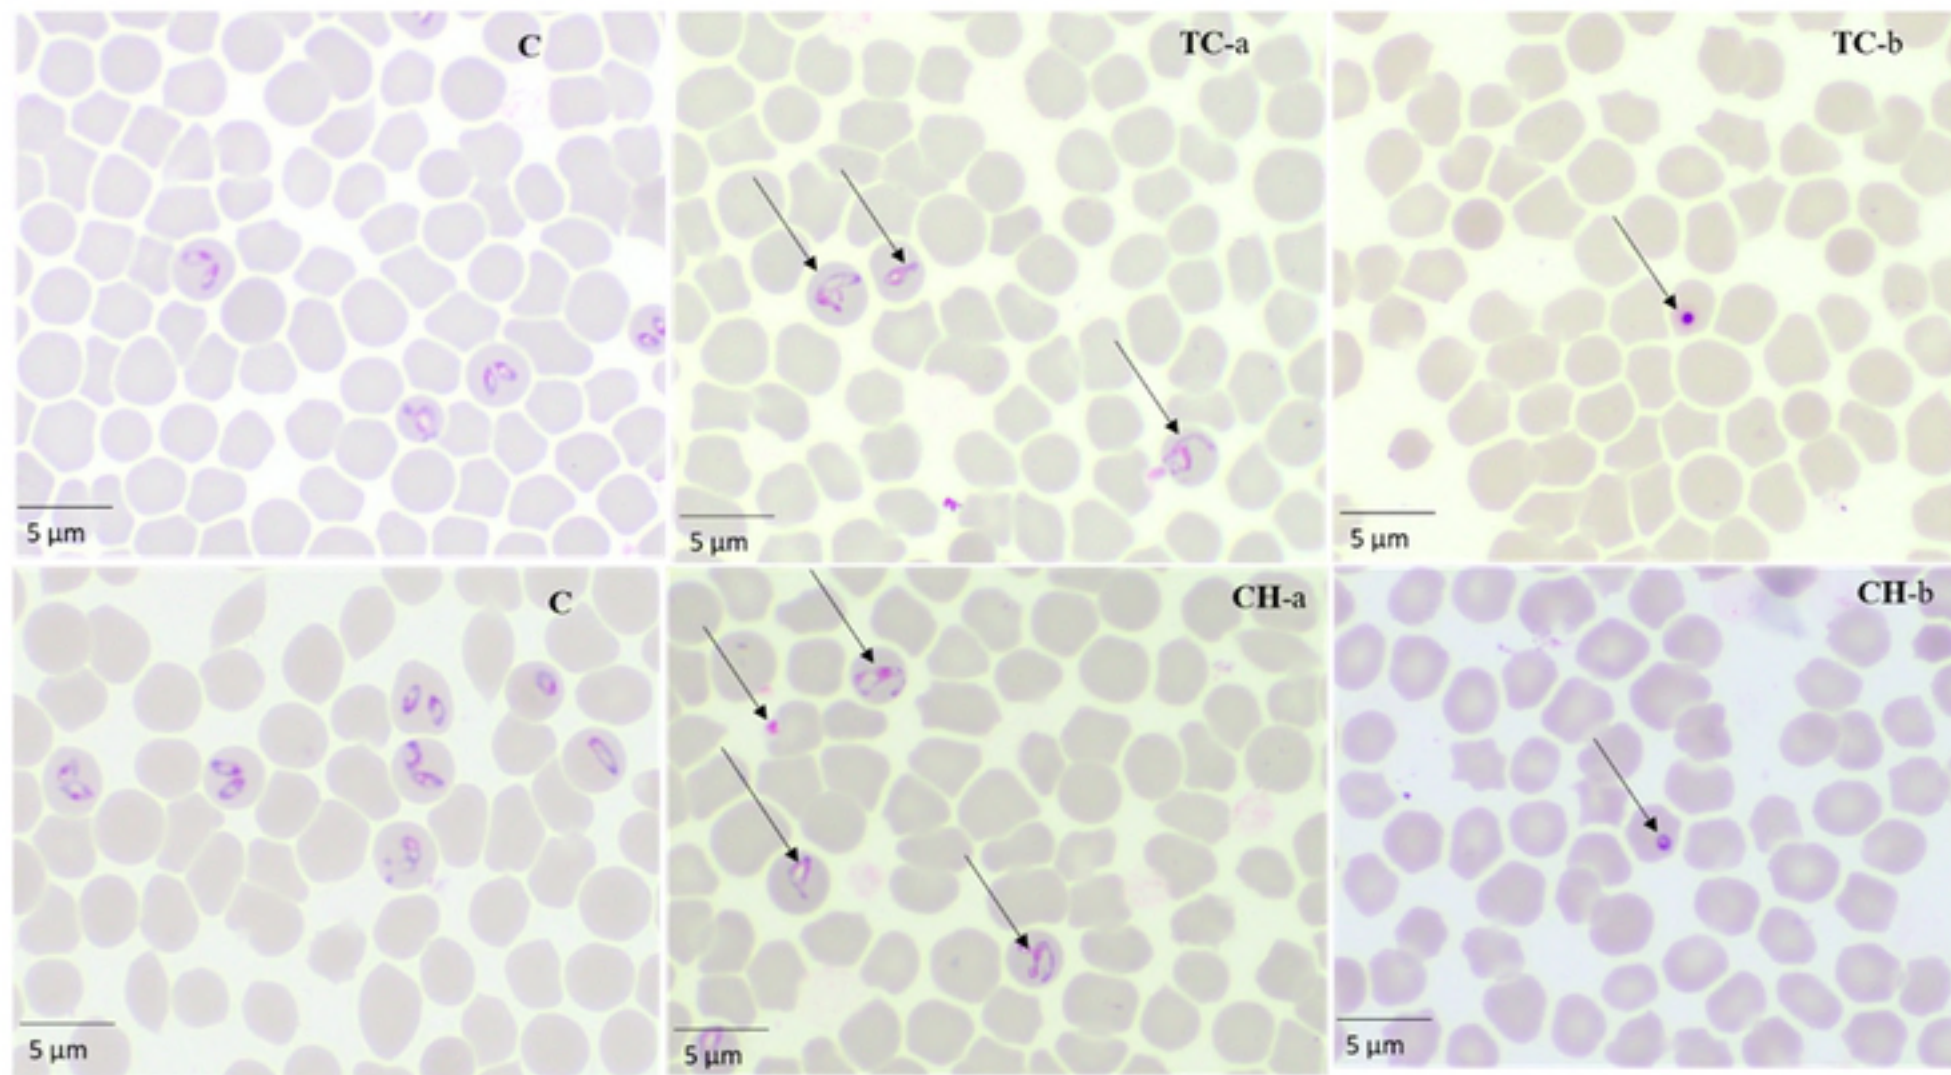

figure

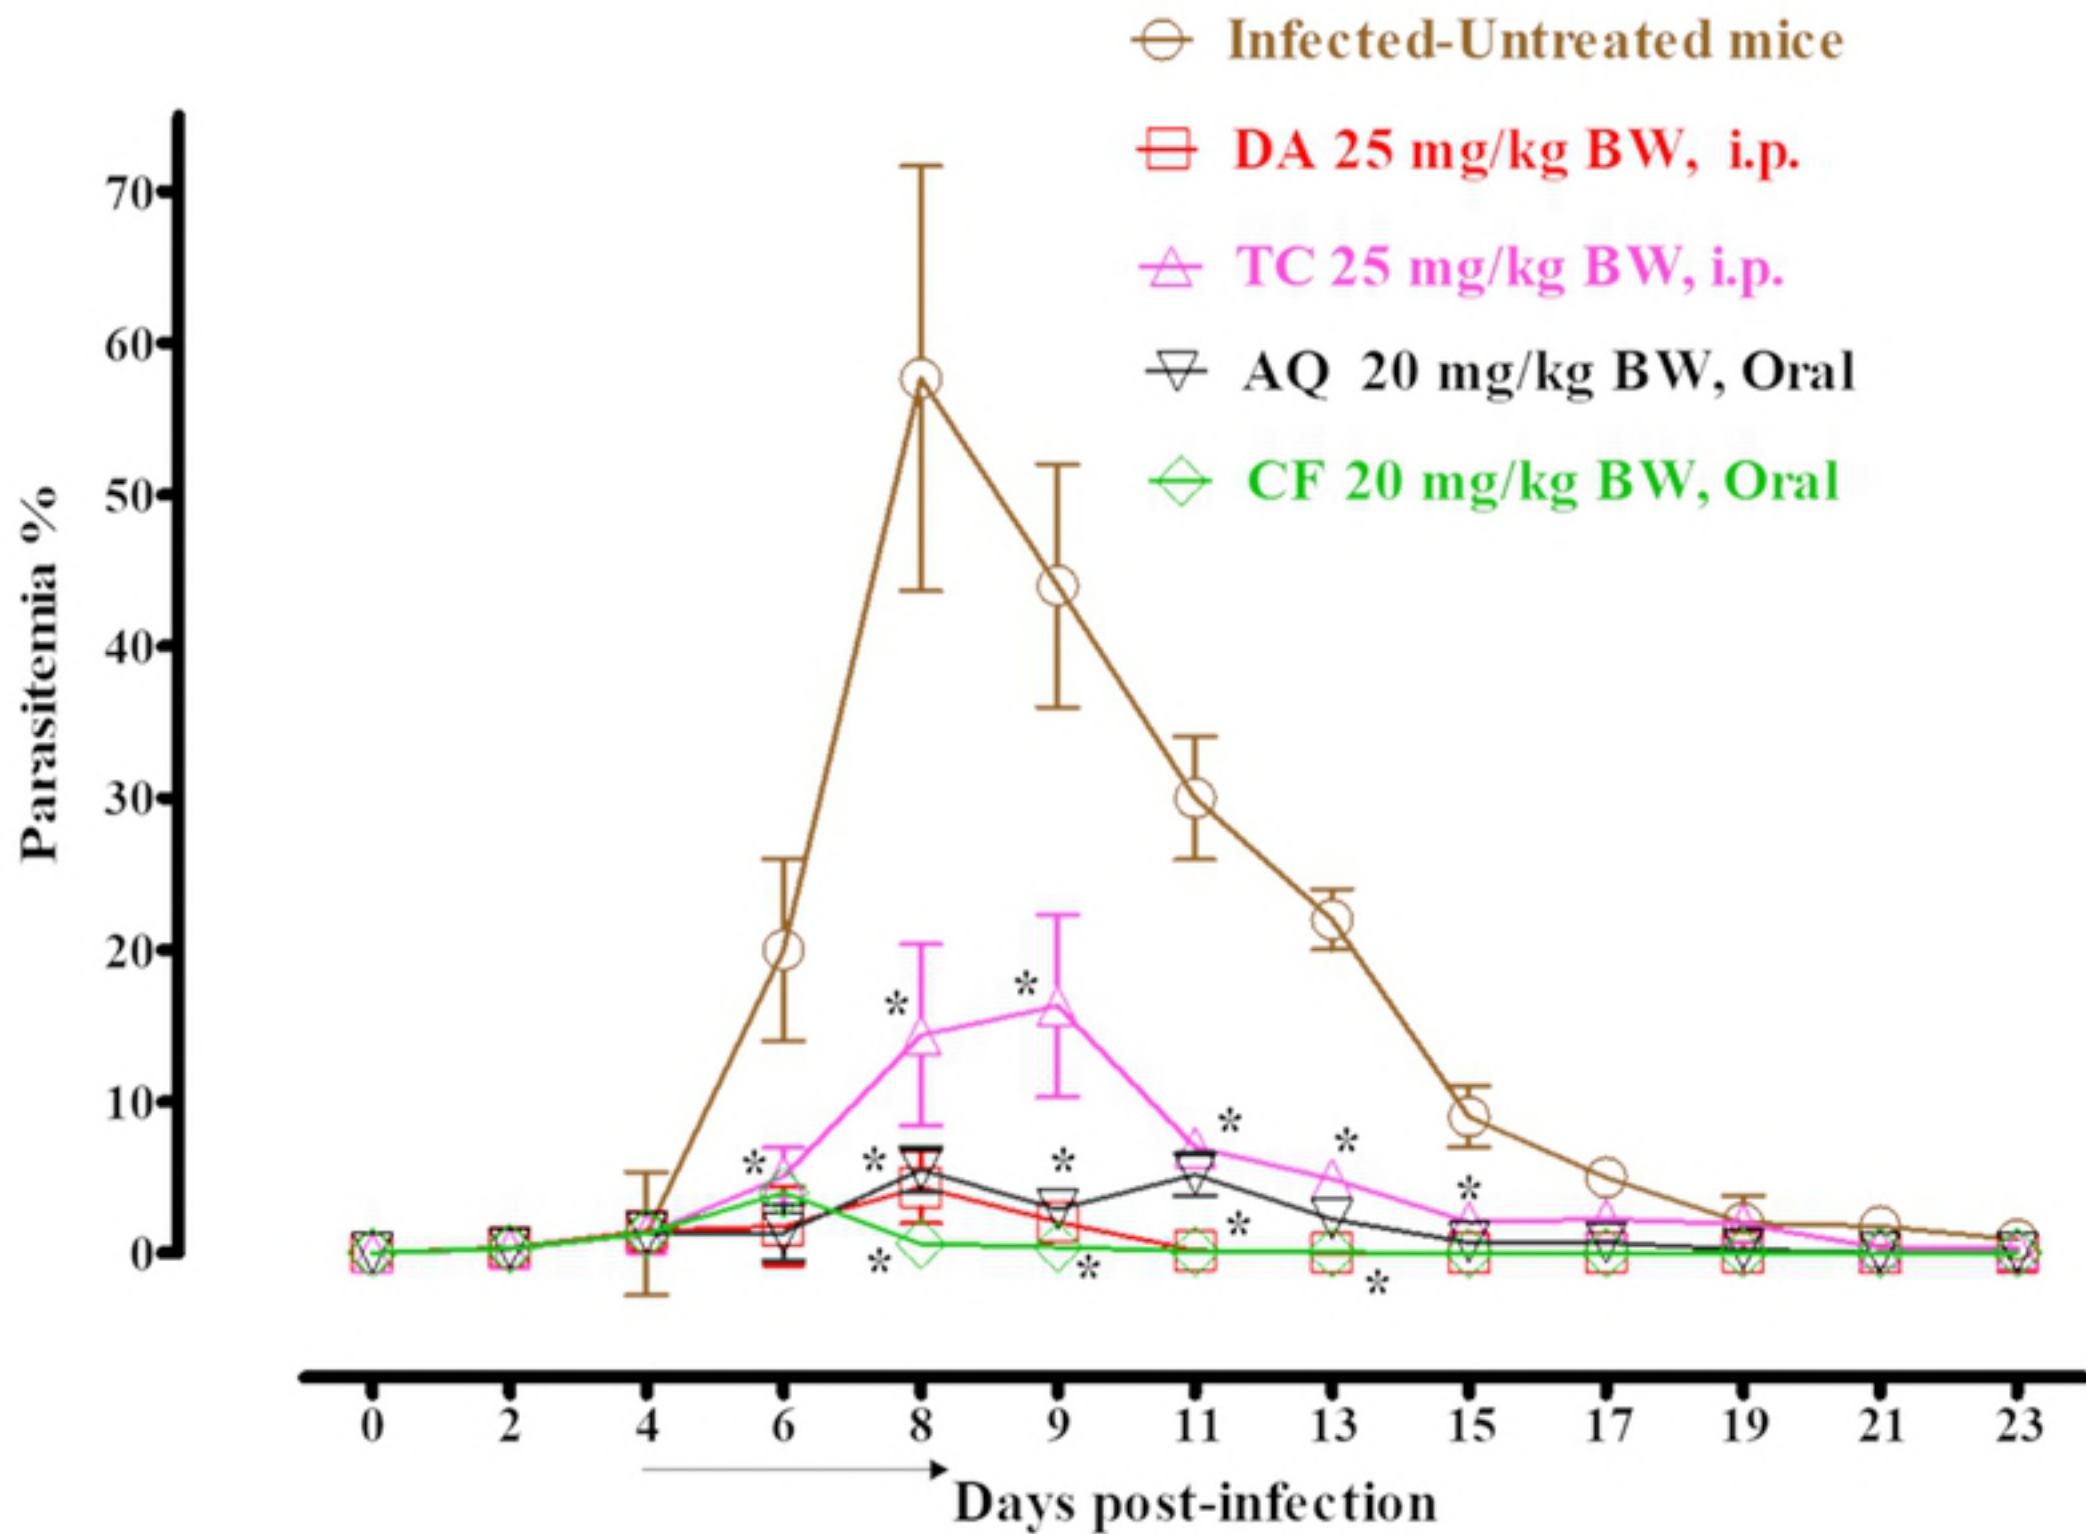

figure

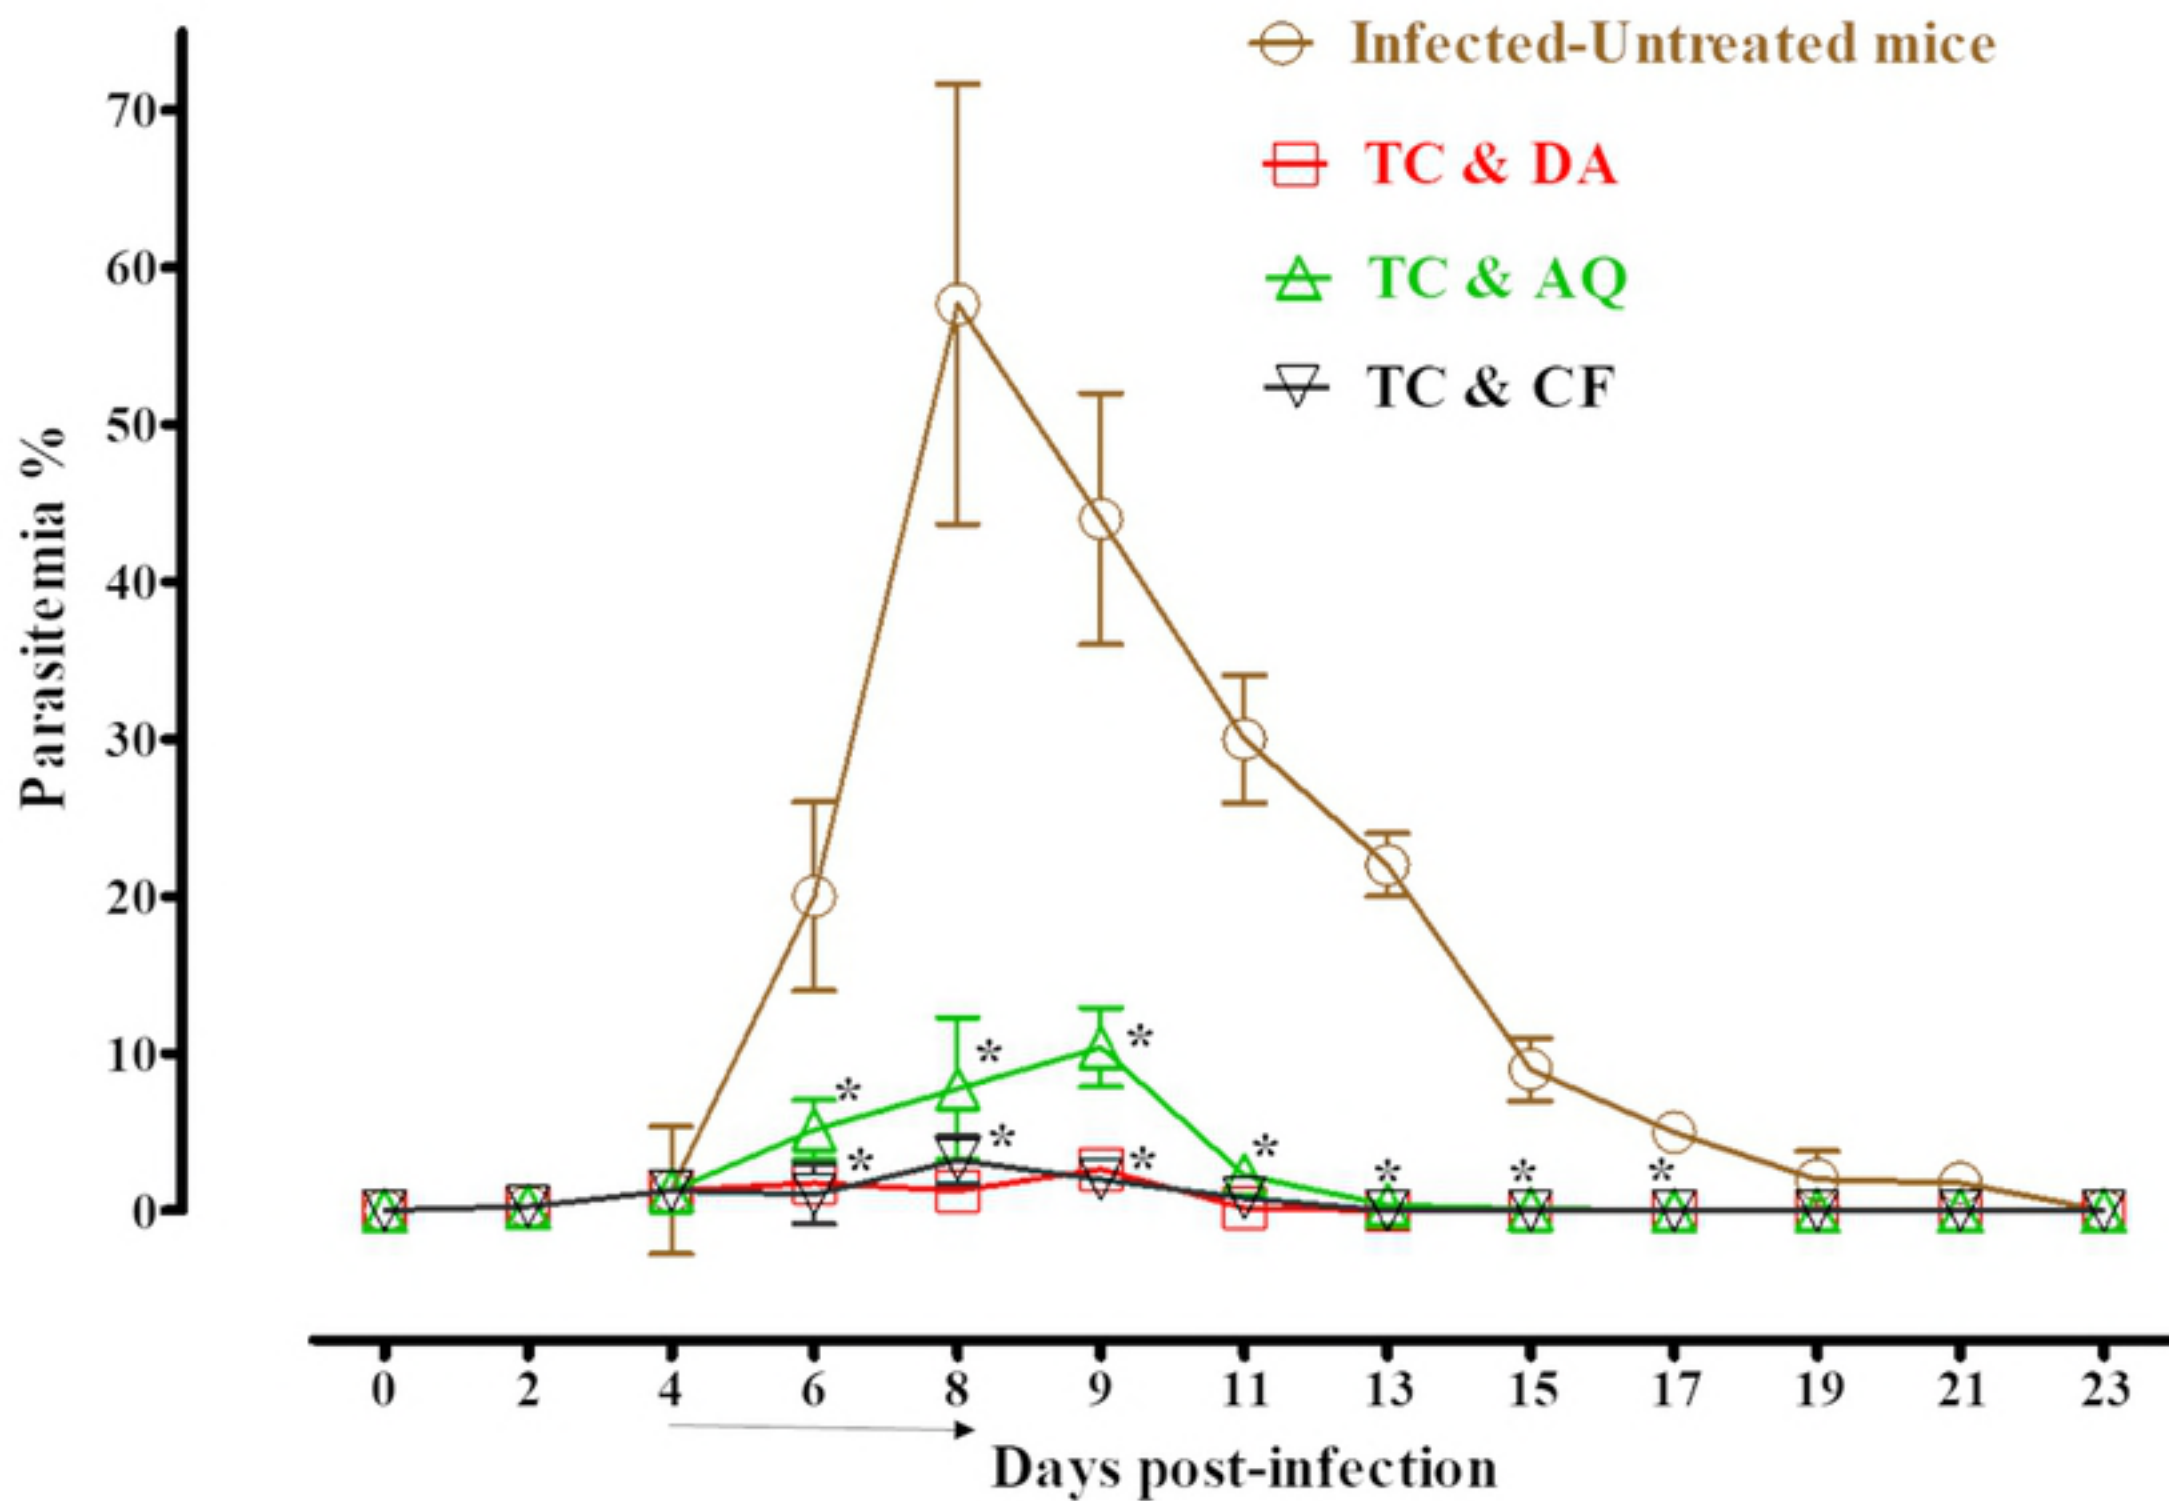

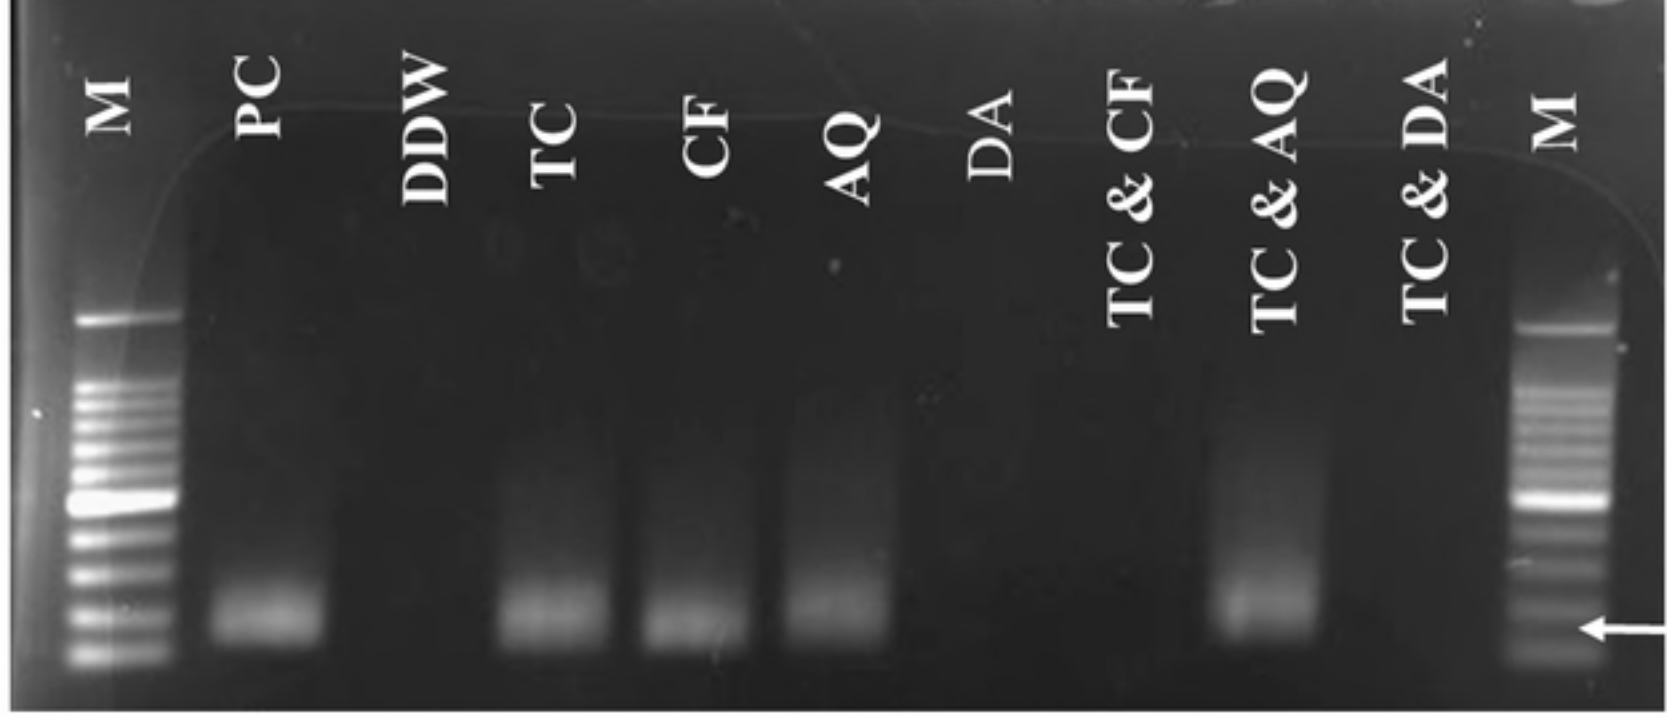

figure

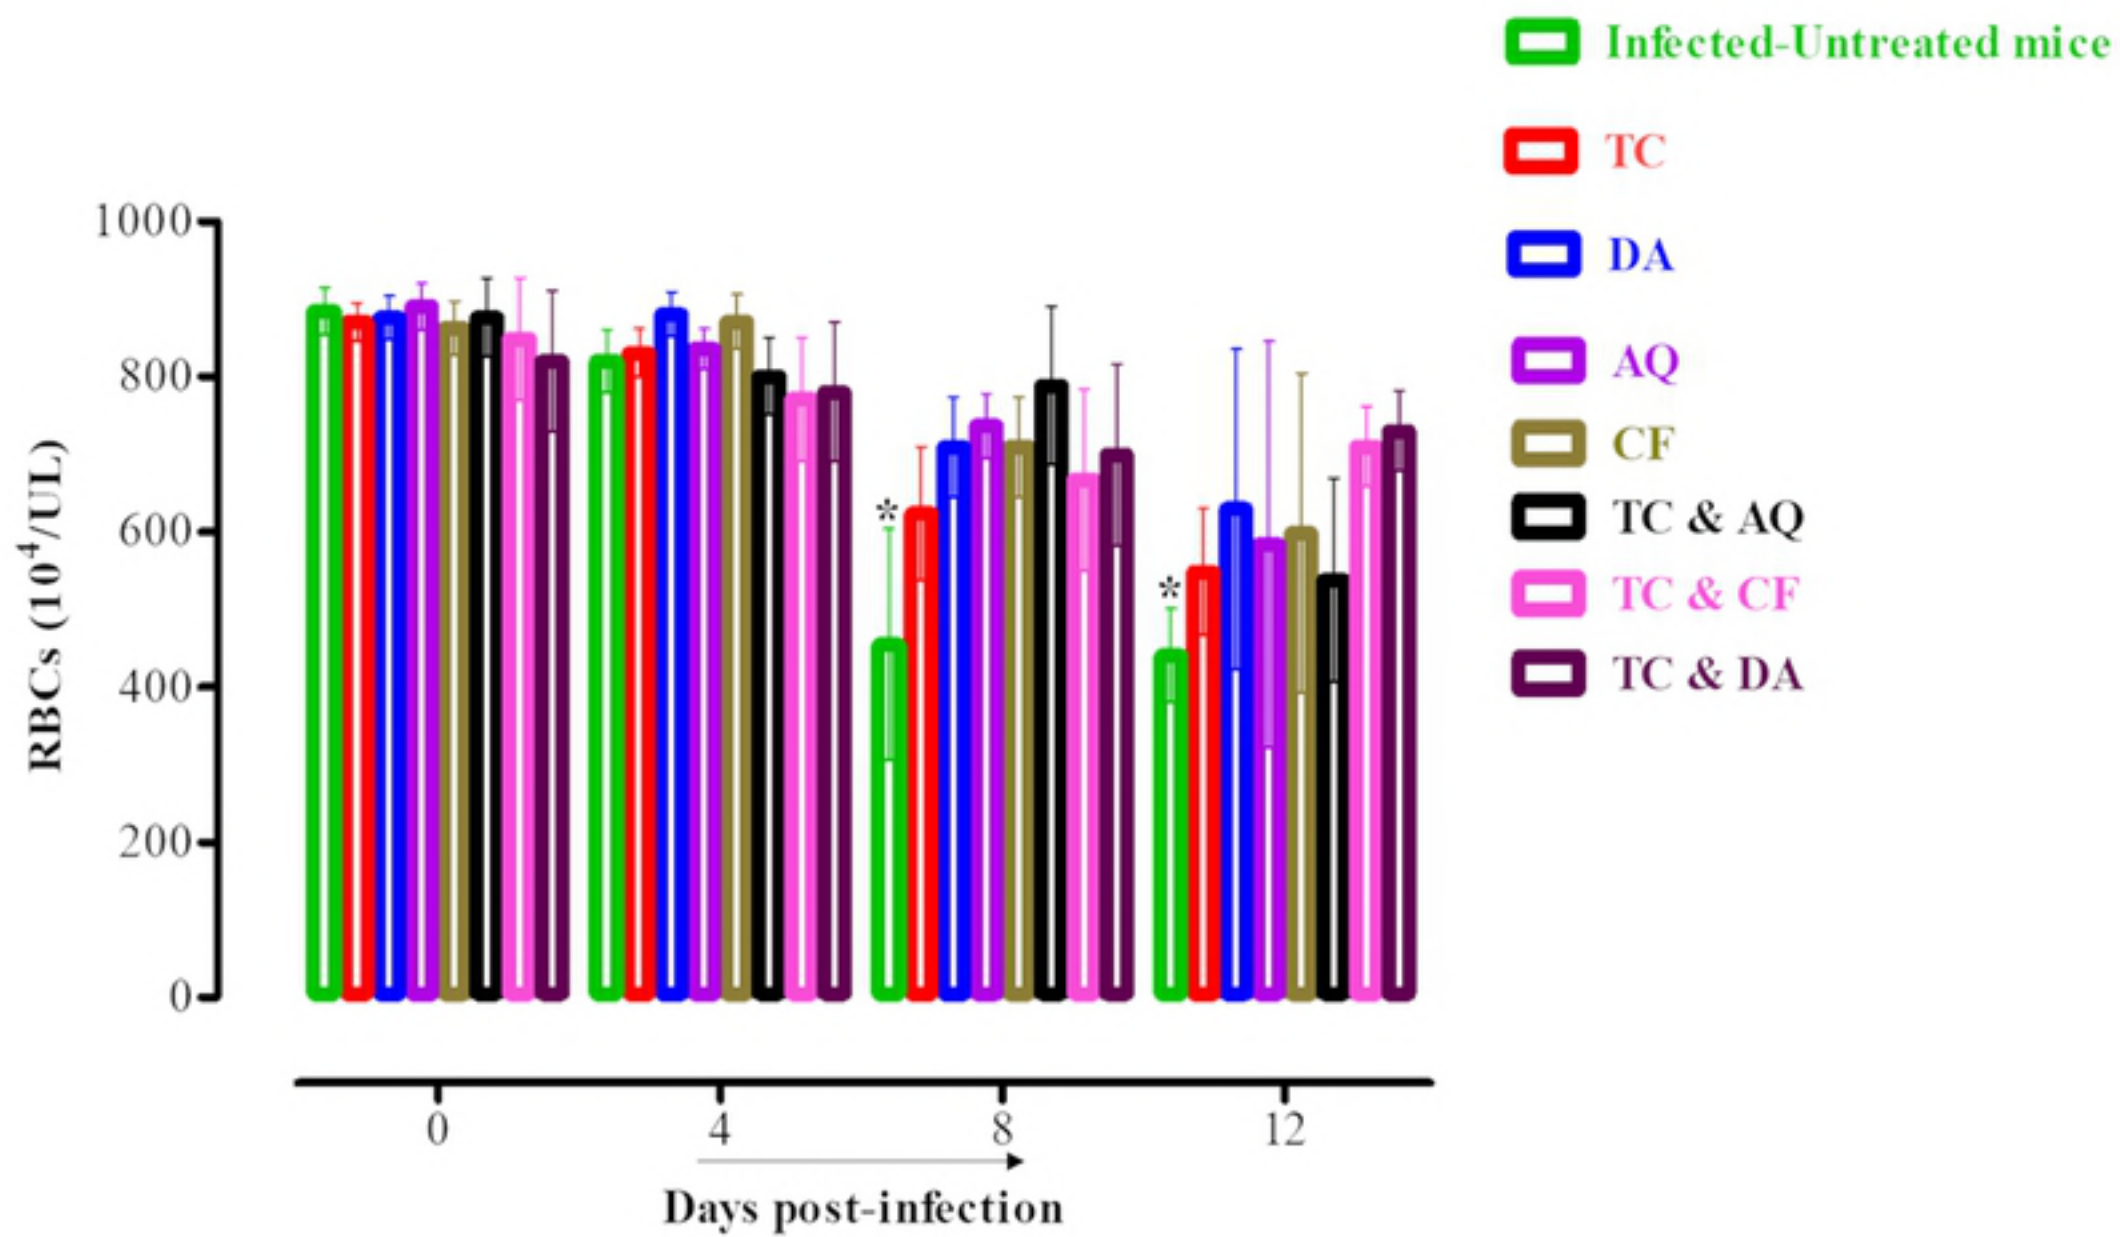

figure

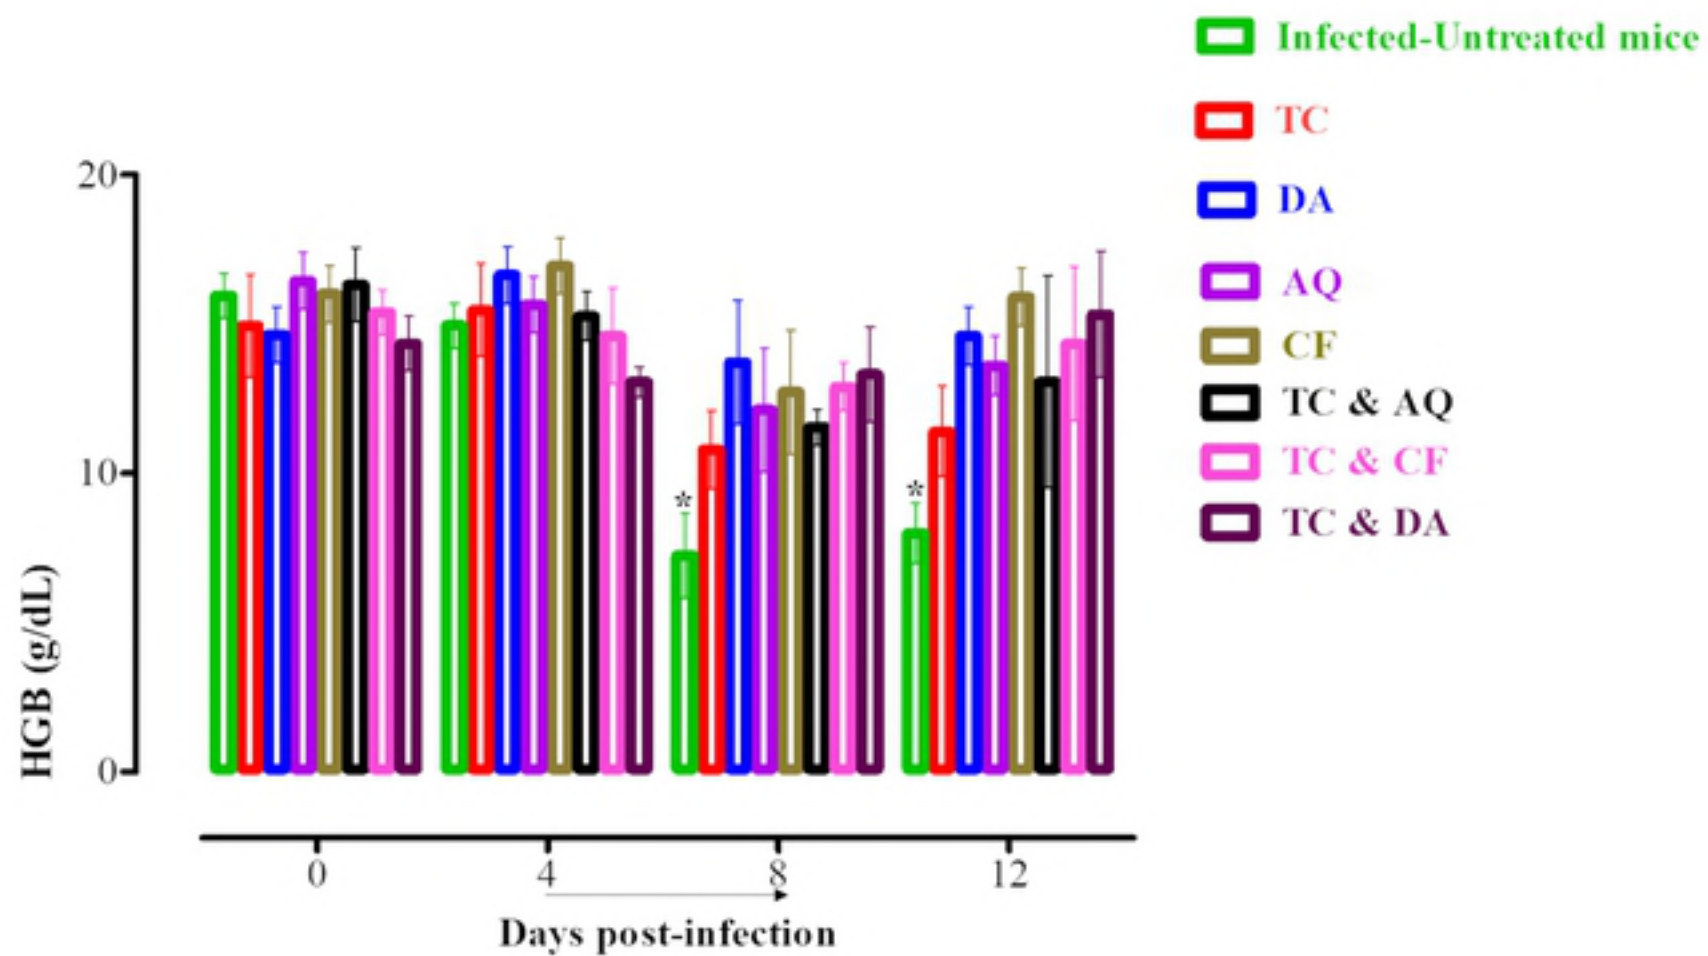

figure

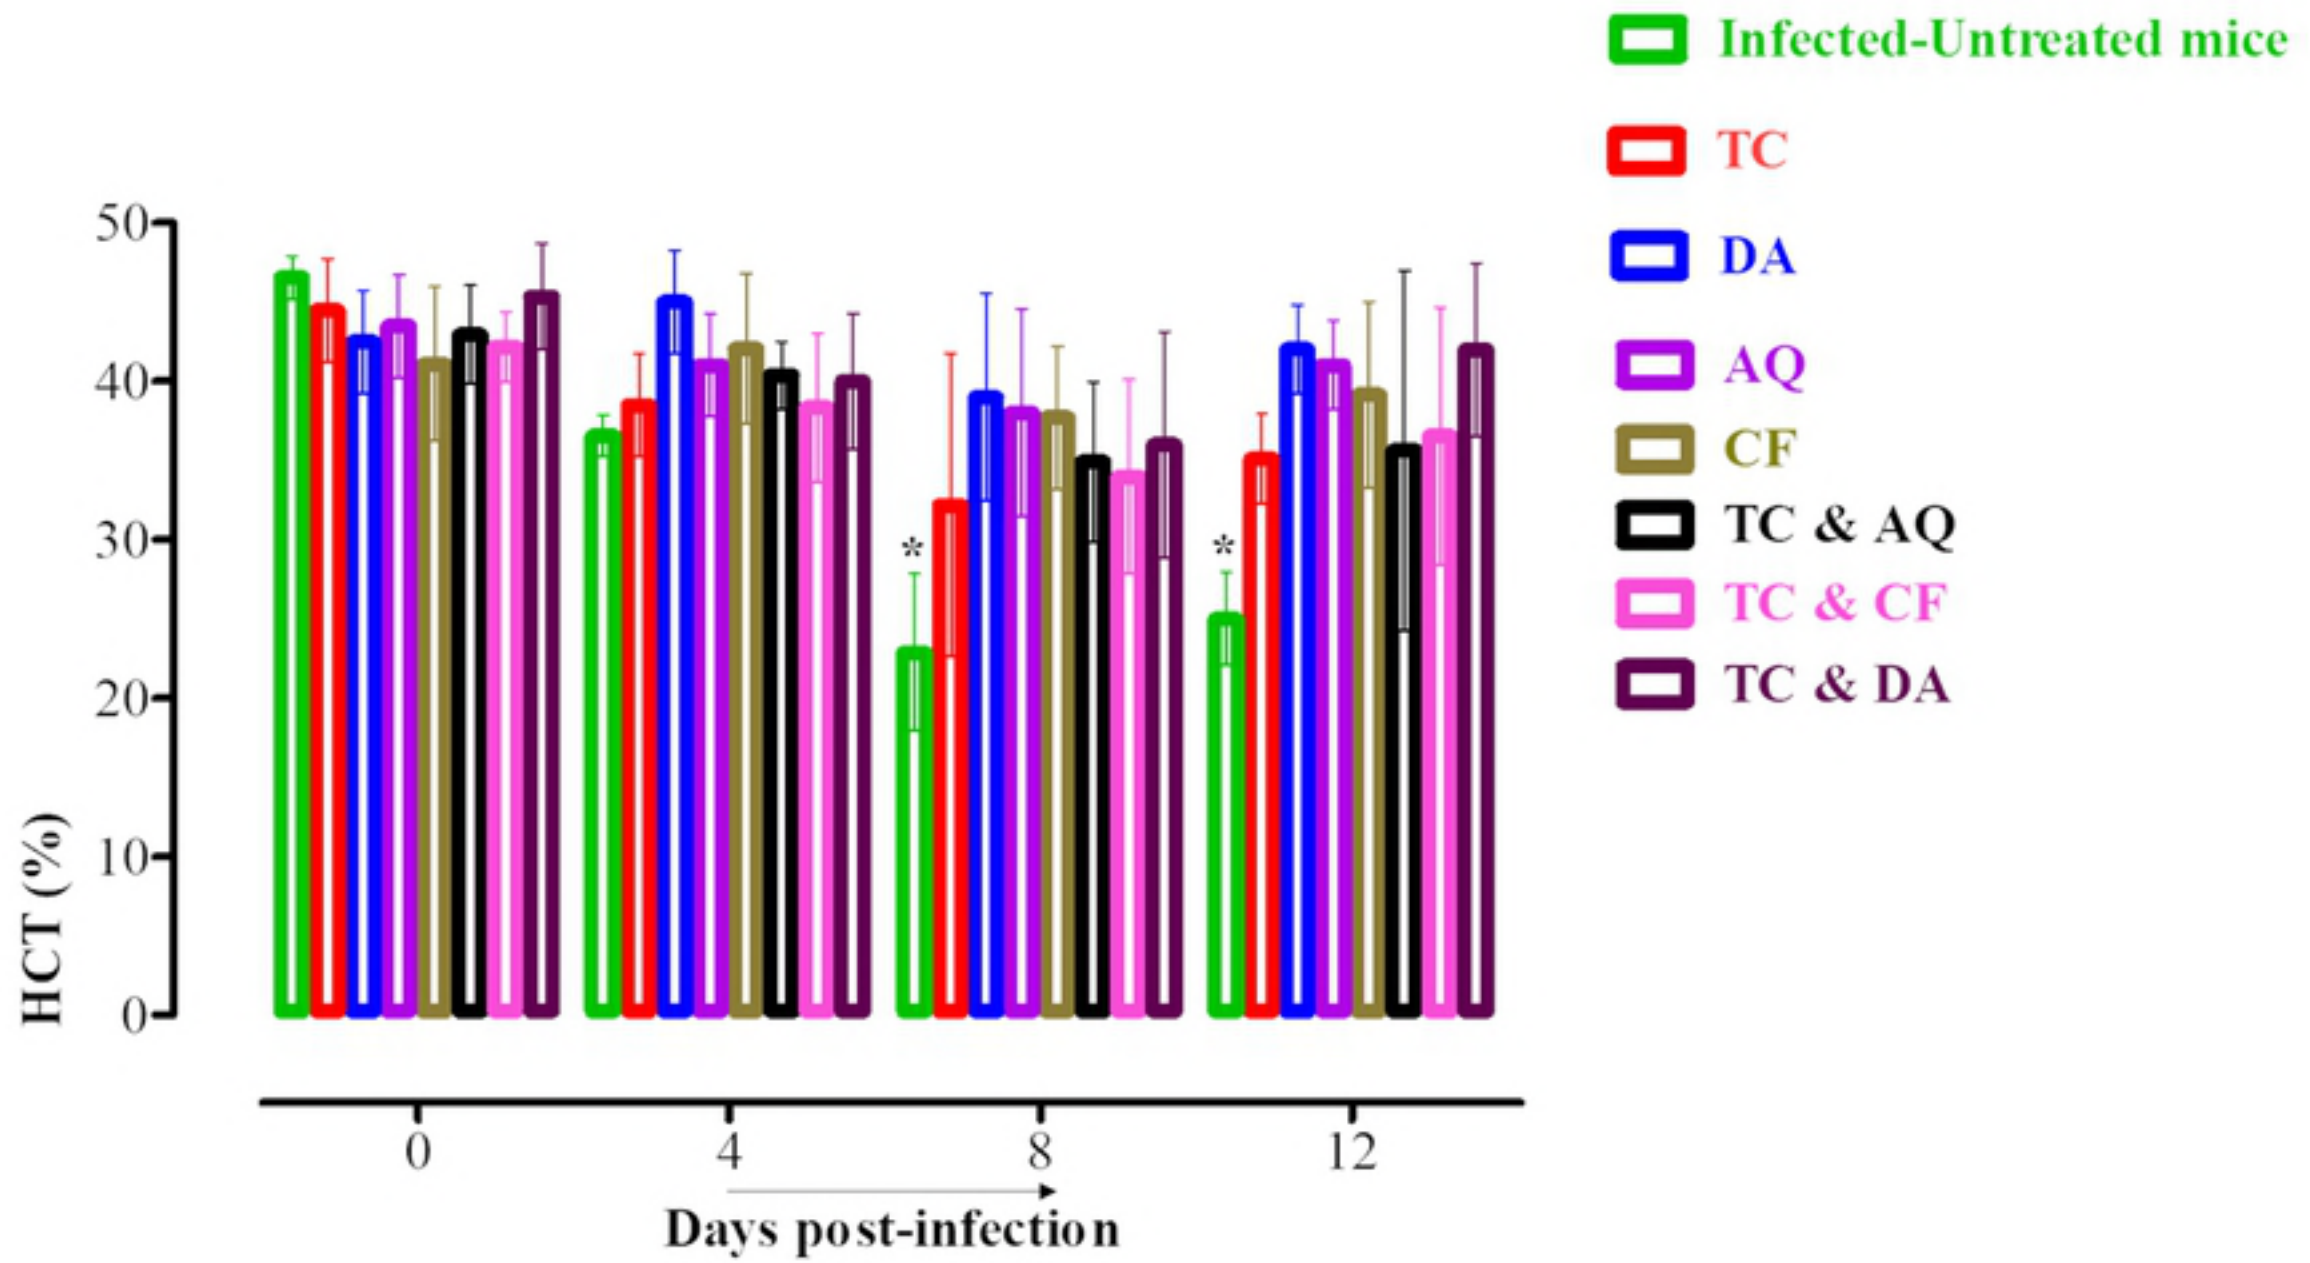

Source: https://www.biorxiv.org/content/10.1101/480657v1.full.pdf
